# Supplementary material for: Training physicians in providing complex information to patients with multiple sclerosis: a randomised controlled trial
Source: PubMed Central journal article supplement — BMJ Open. 2022 Mar 15;12(3):e049817. doi: 10.1136/bmjopen-2021-049817 (PMC8928319; doi:10.1136/bmjopen-2021-049817), 2022-03-15
Supplement: bmjopen-2021-049817.draft_revisions.pdf [file bmjopen-2021-049817.draft_revisions.pdf]

# BMJ Open

BMJ Open is committed to open peer review. As part of this commitment we make the peer review history of every article we publish publicly available.

When an article is published we post the peer reviewers' comments and the authors' responses online. We also post the versions of the paper that were used during peer review. These are the versions that the peer review comments apply to.

The versions of the paper that follow are the versions that were submitted during the peer review process. They are not the versions of record or the final published versions. They should not be cited or distributed as the published version of this manuscript.

BMJ Open is an open access journal and the full, final, typeset and author-corrected version of record of the manuscript is available on our site with no access controls, subscription charges or pay-per-view fees (<http://bmjopen.bmj.com>).

If you have any questions on BMJ Open's open peer review process please email [info.bmjopen@bmj.com](mailto:info.bmjopen@bmj.com)

# BMJ Open

## An intervention to improve complex information provision to multiple sclerosis patients in need of treatment escalation: A randomised controlled trial

|                               |                                                                                                                                                                                                                                                                                                                                                                                                                                                                                                                                                                                  |
|-------------------------------|----------------------------------------------------------------------------------------------------------------------------------------------------------------------------------------------------------------------------------------------------------------------------------------------------------------------------------------------------------------------------------------------------------------------------------------------------------------------------------------------------------------------------------------------------------------------------------|
| Journal:                      | <i>BMJ Open</i>                                                                                                                                                                                                                                                                                                                                                                                                                                                                                                                                                                  |
| Manuscript ID                 | bmjopen-2021-049817                                                                                                                                                                                                                                                                                                                                                                                                                                                                                                                                                              |
| Article Type:                 | Original research                                                                                                                                                                                                                                                                                                                                                                                                                                                                                                                                                                |
| Date Submitted by the Author: | 03-Feb-2021                                                                                                                                                                                                                                                                                                                                                                                                                                                                                                                                                                      |
| Complete List of Authors:     | Nordfalk, Jenny; Akershus University Hospital, Department of Neurology<br>Thomas, O.; Akershus University Hospital, Health Services Research Unit HØKH<br>Holmøy, Trygve; Akershus University Hospital Neuroclinic, Department of Neurology; University of Oslo Faculty of Medicine, Institute of Clinical Medicine<br>Nylenna, Magne; Norwegian Institute of Public Health, Institute of Health and Society<br>Gulbrandsen, Pal; Universitetet i Oslo Det medisinske fakultet, Institute of Clinical Medicine; Akershus University Hospital, Health Services Research Unit HØKH |
| Keywords:                     | Multiple sclerosis < NEUROLOGY, MEDICAL EDUCATION & TRAINING, Quality in health care < HEALTH SERVICES ADMINISTRATION & MANAGEMENT                                                                                                                                                                                                                                                                                                                                                                                                                                               |
|                               |                                                                                                                                                                                                                                                                                                                                                                                                                                                                                                                                                                                  |

SCHOLARONE™  
Manuscripts

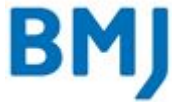

I, the Submitting Author has the right to grant and does grant on behalf of all authors of the Work (as defined in the below author licence), an exclusive licence and/or a non-exclusive licence for contributions from authors who are: i) UK Crown employees; ii) where BMJ has agreed a CC-BY licence shall apply, and/or iii) in accordance with the terms applicable for US Federal Government officers or employees acting as part of their official duties; on a worldwide, perpetual, irrevocable, royalty-free basis to BMJ Publishing Group Ltd ("BMJ") its licensees and where the relevant Journal is co-owned by BMJ to the co-owners of the Journal, to publish the Work in this journal and any other BMJ products and to exploit all rights, as set out in our [licence](#).

The Submitting Author accepts and understands that any supply made under these terms is made by BMJ to the Submitting Author unless you are acting as an employee on behalf of your employer or a postgraduate student of an affiliated institution which is paying any applicable article publishing charge ("APC") for Open Access articles. Where the Submitting Author wishes to make the Work available on an Open Access basis (and intends to pay the relevant APC), the terms of reuse of such Open Access shall be governed by a Creative Commons licence – details of these licences and which [Creative Commons](#) licence will apply to this Work are set out in our licence referred to above.

Other than as permitted in any relevant BMJ Author's Self Archiving Policies, I confirm this Work has not been accepted for publication elsewhere, is not being considered for publication elsewhere and does not duplicate material already published. I confirm all authors consent to publication of this Work and authorise the granting of this licence.

# **An intervention to improve complex information provision to multiple sclerosis patients in need of treatment escalation: A randomised controlled trial**

Nordfalk J.M.<sup>1</sup>, Holmøy T.<sup>2</sup>, Thomas O.<sup>3</sup>, Nylenna M.<sup>4</sup>, Gulbrandsen P.<sup>5</sup>

<sup>1</sup>Jenny M. Nordfalk, Department of Neurology, Akershus University Hospital, Mail drawer 1000, 1478 Lørenskog, Norway.

<sup>2</sup>Trygve Holmøy, Department of Neurology, Akershus University Hospital, Institute of Clinical Medicine, University of Oslo, Mail drawer 1000, 1478 Lørenskog, Norway.

<sup>3</sup>Owen Thomas, Health Services Research Unit HØKH, Akershus University Hospital, Mail drawer 1000, 1478 Lørenskog, Norway.

<sup>4</sup>Magne Nylenna, Institute of Health and Society, University of Oslo; Norwegian Institute of Public Health, PO Box 222 Skøyen 0213 Oslo, Norway.

<sup>5</sup>Pål Gulbrandsen, Institute of Clinical Medicine, University of Oslo, Health Services Research Unit HØKH, Akershus University Hospital, Mail drawer 1000, 1478 Lørenskog, Norway.

Corresponding author at: Jenny M. Nordfalk, Health Services Research Unit HØKH, Akershus University Hospital, Mail drawer 1000, 1478 Lørenskog, Norway, nordfalk@yahoo.no

Word count: 3439

Keywords: Multiple Sclerosis, patient information, communication, randomised controlled trial

## ABSTRACT

**Objective:** To evaluate the effect of a specific communication training for neurologists on how to provide complex information about treatment options to multiple sclerosis (MS) patients.

**Design:** Single-centre, single-blind, randomised controlled trial.

**Setting:** One university hospital in Norway.

**Participants:** Thirty-four early-stage Multiple Sclerosis (MS) patients.

**Intervention:** A three-hour training for neurologists on how to provide complex information about MS escalation therapy.

**Main outcome measures:** Patient recall rate, measured with a reliable counting system of provided and recalled information about drugs.

**Secondary outcome measures:** Number of information units provided by the physicians. Effects on patient involvement through questionnaires.

**Methods:** The MS patients were instructed to imagine a disease development, and were randomized and blinded to meet a physician to receive information on escalation therapy, before or after the physician had participated in a three-hour training on how to provide complex information. Consultations and immediate patient recall interviews were video-recorded and transcribed verbatim.

**Results:** Patient recall rate was 0.37 (SD=0.10) pre-intervention and 0.39 (SD=0.10) post-intervention. The effect of the intervention on recall rate predicted with a general linear model (GLM) covariate was not significant (coefficient parameter 0.07 (SE 0.04, 95% confidence interval (CI) [-0.01; 0.15]),  $p=0.099$ ).

The physicians tended to provide significantly fewer information units after the training, with an average of 91.0 (SD=30.3) pre-intervention and 76.5 (SD=17.4) post-intervention; coefficient parameter -0.09 (SE 0.02, 95% CI [-0.13; -0.05]),  $p<0.001$ . There was a significant negative association between the amount of provided information and the recall rate (coefficient parameter -0.29 (SE 0.05, 95% CI [-0.39; -0.18]),  $p<0.001$ ). We found no significant effects on patient involvement using the Control Preference Scale, Collaborate, or Four Habits Patient Questionnaire.

**Conclusion:** A brief course for physicians on providing complex information reduced the amount of information provided, but did not improve patient recall rate.

**Trial registration:** ISRCRTN 32248

### Strengths and limitations of this study:

- RCT design, adapted to health communication research
- Multiple sclerosis patients with unique insight in the disease, and emotional connection to the information
- Reliable measurement of recall of complex information given in free speech
- A small sample

## INTRODUCTION

Multiple sclerosis (MS) immunomodulatory treatment has become increasingly complex as new drugs have been introduced, differing in efficacy, risk/adverse effect profile and administration form.<sup>1 2</sup> In Norway, guidelines for MS treatment issued by the Norwegian Directorate of Health state which disease-modifying therapies (DMT) should be introduced initially, and which should be introduced as escalation therapy when relapse occurs<sup>3</sup> or if the patient initially presents with a very active disease.<sup>2</sup>

Informing MS patients about escalation therapy alternatives involves comprehensive exchange of situation-specific information, including risks and effects subject to uncertainty. This information is usually delivered by a neurologist in a task-based but unscripted dialogue with a patient who is experiencing an emotionally charged situation.<sup>4 5</sup>

Medical information should ideally be provided in a way that enables patient autonomy and involvement in treatment decisions.<sup>6</sup> Patients desire tailored information.<sup>7-9</sup> The quality of communication is therefore crucial, if not clearly proven to influence the patients' ability to manage their disease,<sup>7 8 10</sup> at least to improve patient adherence.<sup>11</sup>

Several studies have shown that recall of medical information is suboptimal.<sup>12-17</sup> Cognitive impairments associated with MS make information processing more difficult.<sup>18-20</sup> Even in early-stage MS, subtle memory disturbance has been shown to be common.<sup>21 22</sup> Improvement of information recall among MS patients is necessary to avoid lack of patient involvement, adherence, and poor outcomes.

A few studies have investigated patient uptake of complex information as an outcome measure; most have directed interventions at patients.<sup>23 24</sup> Intervention studies that link communication training of physicians to patient outcomes in general are rare,<sup>25 26</sup> and to patient recall even more so. The question has been raised whether recall in complex chronic illness management could be improved by changing the communication behaviour of health care personnel.<sup>24</sup> Various oral communication strategies have been examined and found to improve patient recall in various ways; like repetition,<sup>27 28</sup> simplification of language, pauses, personal relevance,<sup>28-30</sup> and structuring.<sup>28 31</sup> One recent study has shown recall rate improvement by information structuring and categorization, but only for disadvantaged subgroups of a population.<sup>32</sup> Other studies have not showed such an effect, and the phenomena remain understudied in clinical populations.<sup>33</sup> Lehmann et al. did show that providers should tailor both portioning and amount of information to patient preferences, as those wanting more, also recalled more information.<sup>34</sup>

However, the interventions investigated have usually been long, and most often involved video-vignettes studies or analogue patients, i.e., healthy subjects pretending to be patients. Studies have usually tested single, generic strategies, not a set of strategies selected and tailored to the needs of a specific group of professionals and rarely performed in unscripted conversations with real patients. Hence, ecological validity remains unclear. Furthermore, increasing demand on cost control in healthcare makes long training interventions for physicians less attractive to administrators.

In order to accommodate these shortcomings, this study tested a very brief communication training intervention, performed in natural conversations with real patients, albeit in a fictitious setting, with a set of information provision strategies selected to tailor the needs of physicians working with MS patients. We tested whether a brief intervention focused on how to deliver complex information, tailored to a selected population of *physicians*, improved *patient* recall rate.

## METHODS

### Study design

This was a single-center, single blind randomised controlled pilot trial to determine the effect of brief communication skills training for physicians on patient recall of information provided by the physician. Patients with early-stage MS were randomised to be exposed to a physician either before or after training, see an overview of the study design visualized in figure 1.

### Fig. 1 Study Design Overview. Result: Patient recall rate.

<PLEASE INSERT FIGURE 1 HERE>

### Participants and setting

#### Patients

The ability to recall information provided depends on its relevance, degree of patient involvement and the emotional state of the recipient.<sup>17 30 35-37</sup> When designing this experiment, we therefore wanted to recruit real MS patients, who know how it is to live under the sword of Damocles, that is, any time and day symptoms of exacerbations of the disease may appear.<sup>38</sup> To set up an experiment in a communication lab, however, we could not rely on the unpredictable influx of patients in need of escalation therapy. Hence, we approached outpatients identified in the electronic patient records at Akershus University Hospital (Ahus), a teaching hospital in the capital region of Norway with a population uptake area of 575,000 inhabitants.<sup>39</sup> The patients had to meet the following eligibility criteria to be asked for participation and included:

- (a) diagnosed with relapsing remitting MS (RR-MS) between 2009 and 2012;
- (b) currently on no or first-line treatment;
- (c) not yet exposed to a decision about choice of escalation treatment;
- (d) not yet received thorough information about escalation treatment options and their pros and cons by a neurologist.

Eligible patients were asked if they were willing to imagine themselves having experienced exacerbations, and meet a physician to discuss further treatment. If willing, they were included in the study.

## Physicians

We recruited seventeen physicians working in the Neurology Department at Ahus for the study. If willing to participate, they were informed about the following scenario before the study commenced; exacerbation history, results of a recent MRI-scan showing new lesions and a JCV antibody index of 0.8.<sup>40-43</sup> To compensate for differences in their level of experience, they were also provided with an overview of information including risk-benefit stratification for the three most relevant escalation medications commonly used in Norway in 2016; natalizumab, alemtuzumab, and fingolimod.<sup>1 44 45</sup>

## Setting

Consultations and post-consultation recall interviews with patients were video recorded in a communication lab facility on hospital grounds. The patients were instructed beforehand to imagine that they had experienced two recent attacks and had undergone an MRI-scan and blood tests. They were now to consult with a physician about the tests and scan results, receive information about escalation treatment and discuss options. Except for this fictitious setting, the patients were instructed to use their personal history and behave as themselves. Physicians were given approximately 20 minutes for the consultation, to mirror the usual timing of a busy scheduled day. They were instructed to handle the situation as they would have done in their everyday work, basing the discussion of treatment escalation on the individual situation and risk profile of the patient.<sup>2 44</sup>

## Intervention

The intervention was a 3-hour communication training course, specifically focused on structured and patient-centered information provision, and targeted at physicians working in neurology. The course was developed and held by a professor specialized in health communication research with extensive experience in teaching medical students and physicians communication skills (PG). It was a condensed version of patient-centered communication skills training<sup>46</sup> with an emphasis on strategies which have been tested or have been expected to improve recall and understanding (creating a safe environment, exploring the patient's understanding and perspectives, prioritizing and adapting the amount of information to the patient's prior understanding and needs, using signposting, short sentences, pauses, explanations without jargon, and checking for understanding).<sup>27 28 32 47-49</sup> The 3-hour course comprised a 50/50 mix of theoretical instruction and practical training with role plays. Examples and practice cases on treatment decision-making in MS were used. The course was provided in three sessions, for 5-6 physicians at a time, September 21-27, 2016.

## Study procedures

A researcher not involved in the development and delivery of the training (JN) observed the consultation on-screen in an adjacent room while taking notes with the help of an observational sheet. Immediately after the physician had left the room, JN performed



the recall interview with the patient while the recording proceeded uninterrupted (Fig. 2). The recall interview guide was strict, with initial open questions, followed by a tailored part in which JN anchored the questions specifically to the information the doctor had provided during the visit, based on the notes collected during the observation of the specific consultation. Each physician saw two patients, one before and one after attending the communication training. Pre-intervention consultations took place August 16-September 15, 2016, post-intervention consultations took place October 3-November 3, 2016.

## Fig. 2. Data Collection Procedure

<PLEASE INSERT FIGURE 2 HERE>

## Outcomes

### Primary outcome measure

The *from protocol* primary outcome measure was the patient recall rate measured as the amount of information recalled by the patient divided by the amount of information given by the doctor, based on transcripts of the videos. We limited the measurement to information concerning the three most relevant drug alternatives when initiating second-line MS-treatment.<sup>45</sup> We developed a specific system for measuring complex oral information transfer in medical consultations, counting the number of information units provided by the physician, and the proportion of these units recalled by the patients.<sup>50</sup> This measure contains a sophisticated system of definitions that enables a coder to break down complex conversation into the smallest countable units that carry meaningful medical information. One quite simple example would be the statement «One option is Tysabri, which you get in the hospital as a monthly infusion. » Here, the smallest possible units of information are:

- One option is Tysabri [a] – *name of medication 1p*
- In the hospital [b] – *administration place 1p*
- infusion [c] – *administration manner 1p*
- monthly [d] – *administration frequency 1p*

The system involved three researchers (JN, MN, PG) and demonstrated high inter-rater reliability (IRR)<sup>50</sup>. After establishment of the IRR, JN coded all transcripts for this study.

### Secondary outcome measures

The *from protocol* secondary outcome measure was the effect of the intervention on the mean amount of oral information provided by the physicians. We also explored possible effects on patient involvement using the Control Preference Scale (patient),<sup>51</sup> Collaborate,<sup>52 53</sup> and the Four Habits Patient Questionnaire,<sup>54 55</sup> all of these after the consultation.

## Sample size estimation

The study was designed as a preclinical trial. No previous ways of measuring orally provided information were available, so the numerical effect size of the measure we developed,<sup>50</sup> as well as its natural variability, was unknown. For a high effect size, we decided to consider the standard deviation of the measured effect as proxy of the average effect of the intervention. Under standard assumptions of a two-sided t-test of statistical significance at 5% and 80% power, 16 patients in each arm of the study were necessary.

## Randomization

An independent statistician performed the randomization of patients agreeing to participate. The R-method sample (1-42, 21) was used to draw a random subsample of size 21 from the set of 42 patients. (Fig. 3) The four last patients on each list were given substitute status. The random sample was generated without any blocking or stratification restrictions beyond its size. JN enrolled participants and assigned them blinded to either the control or the intervention group.

## Statistical methods

We investigated the effect of the intervention on the recall rate, alongside various secondary outcomes. This was done with separate generalized linear mixed models, using the doctor ID as a random effect and the variables of interest as dependent variables and fixed effects. Likelihood functions were chosen appropriately for the distribution of the dependent variable. Standard maximum likelihood estimates (MLE) inference was pursued, giving corresponding confidence intervals and p-values.

## Ethics, privacy regulations, and pre-trial registration

The trial was registered in ISRCTN ([www.isrctn.com](http://www.isrctn.com)) June 23, 2016, reg. #32248.

The study was considered by The Regional Committee of Southeast Norway for Medical and Health Research Ethics. Reference # 2015/161. The committee decided that as this experiment was not covered by their definitions of medical or health research it was exempted from review. Participants received no compensation for their participation.

## Patient and Public Involvement

An MS patient representative and a professor of medical ethics constituted an advisory group for the project.

## RESULTS

## Participants

All participants, patients and physicians, were included between April 12, 2016 and May 2, 2016. Among approximately 60 resident or consultant physicians employed at the Department of Neurology at Akershus University Hospital, 17 agreed to participate. All provided informed consent. Ten were male (59%), median age was 39 (range 29-57). They had between 2 and 29 years of work experience (median=11) (Table 1).

Table 1. Participant characteristics; Neurologists and patients.

|                              | Neurologists |     | Patients |     |                 |                      |    |
|------------------------------|--------------|-----|----------|-----|-----------------|----------------------|----|
|                              | (n)          | (%) | (n)      | (%) | Control arm (n) | Intervention arm (n) |    |
| All                          | 17           | 100 | All      | 34  | 100             | 17                   | 17 |
| Female                       | 7            | 41  | Female   | 25  | 74              | 12                   | 13 |
| Male                         | 10           | 59  | Male     | 9   | 26              | 5                    | 4  |
| Age by first consultation    |              |     | Age      |     |                 |                      |    |
| <36                          | 3            | 18  | 21-30    | 3   | 9               | 1                    | 2  |
| 36-45                        | 10           | 59  | 31-40    | 6   | 18              | 2                    | 4  |
| >45                          | 4            | 24  | 41-50    | 16  | 47              | 10                   | 5  |
| Years of clinical experience |              |     | 51-60    | 7   | 21              | 3                    | 4  |
| <5                           | 4            | 24  | 61-70    | 2   | 6               | 0                    | 2  |
| 6-10                         | 3            | 18  |          |     |                 |                      |    |
| 11-15                        | 6            | 35  |          |     |                 |                      |    |
| >15                          | 4            | 24  |          |     |                 |                      |    |

1 Patient recruitment is shown in figure 3. Out of the 53 eligible MS patients we reached, 42 agreed to participate and provided  
2 informed consent (79%). They were randomised into two groups, each with 17 participants and 4 substitutes. 34 finally  
3 participated in the study. Median age was 48 (range 21-66 years old). Twenty-five were female (Table 1).

4 An overview of the participant flow is shown in figure 3. Three patients opted out after the study had begun, but before partaking,  
5 and was replaced by substitutes already randomised to the same arm.  
6  
7  
8  
9

### 10 **Fig. 3 CONSORT 2010 Participant Flow.**

11 <PLEASE INSERT FIGURE 3 HERE>  
12  
13  
14  
15  
16

17 Both pre- and post-intervention consultations lasted on average 21 minutes (range 8-29 minutes, median 20 minutes). From the  
18 consultation transcripts, 1652 physician statements containing information about the three predefined drug alternatives were  
19 identified.  
20  
21  
22  
23  
24  
25  
26

### 27 **Primary and secondary outcomes**

28 The recall rate was 0.37 in the pre-intervention group and 0.39 in the post-intervention group. When predicting the recall rate with  
29 the intervention using a binomial likelihood, we found the general linear model (GLM) covariate coefficient parameter 0.07 (SE  
30 0.04, 95% confidence interval (CI) [-0.01; 0.15]),  $p=0.099$ .  
31  
32  
33  
34  
35  
36

37 The average number of oral information units provided by the physicians before and after the intervention were 91.0 and 76.5,  
38 respectively. When predicting this *a priori* secondary outcome with the intervention using a Poisson likelihood, we found the  
39 coefficient parameter -0.09 (SE 0.02, 95% CI [-0.13; -0.05]),  $p<0.001$ . When predicting the recall rate with the amount of  
40 information provided, we found the coefficient parameter -0.29 (SE 0.05, 95% CI [-0.39; -0.18]),  $p<0.001$ .  
41  
42  
43  
44  
45  
46

47 We found no significant effects of the intervention on patient involvement using the Control Preference Scale, Collaborate, or  
48 Four Habits Patient Questionnaire. We also did not find effects of the patient's gender or age on recall rate.  
49  
50  
51  
52  
53

## 54 **DISCUSSION**

55 We embarked on this study knowing that hospitals are reluctant to spend resources on extensive courses if strong effects are not  
56 demonstrated, and hoping that focus on a simple set of instructions could render a physician behavioural change strong enough to  
57 have a detectable effect on patient recall in a small pilot study. We did this, even though two systematic reviews on the effect of  
58  
59  
60

1 general communication skills courses suggested that brief interventions consistently yielded small effects.<sup>23 56</sup> However, some  
2 papers suggested that courses of five hours or less could have effect.<sup>57-60</sup> These studies addressed emotional communication,  
3 patient participation effect,<sup>57 58 60</sup> or a very simple instruction about *one* medication,<sup>59</sup> and did not introduce patient adjusted  
4 information provision. Neither did they measure effect of the intervention by actual measurement of patient recall. Our study  
5 encompassed tailored information giving in a free dialogue with a real patient. Tailored information provision is a complex task,  
6 particularly so in the case of involving real patients in decision making about second-line treatment for MS, which requires that  
7 they be well informed about pros and cons of options. The information given in our data set was a lot more complex than in the  
8 studies referenced above. Our study suggests that complex information giving tasks require more extensive training than a 3-h  
9 course to achieve substantial changes in patient recall, at least in decisions as difficult as choice of MS treatment.

10  
11  
12  
13  
14  
15  
16  
17  
18  
19  
20  
21 In accordance with the principle of prioritizing information tailored to the patient,<sup>34</sup> which was one of the strategies taught to  
22 physicians in our training, we observed a significant decrease in the amount of information provided by physicians (secondary  
23 outcome) after having received the training. We also found that the recall rate decreased with increased amount of information  
24 provided, which is in line with previous findings.<sup>35 61</sup>

25  
26  
27  
28  
29 Questionnaires did not document changes in patient involvement. We did not expect to find changes in such proxy measures in a  
30 small pilot, particularly as the intervention was directed foremost to improve information provision, not patient involvement.  
31 However, in case we had found changes in patient involvement, we could have explored associations between observed physician  
32 behaviour (not reported in this paper), and involvement.

33  
34  
35  
36  
37  
38  
39  
40 The strengths of this study, besides the RCT design, are several. Real MS patients could easily envision the fictitious position they  
41 were in during the consultation, so that information was highly relevant and with potential to evoke emotions. The physicians  
42 were not instructed to provide a prefixed set of information, but rather inform the patients according to what happened in the  
43 encounter, closely resembling real clinical situations. The recall interview used a technique with questions specifically anchored  
44 to the information that had been given, thus providing memory cues without “helping” the patient. The effect measure was direct  
45 recall as fraction of information provided, not more commonly used proxy measurements using questionnaires.

46  
47  
48  
49  
50  
51  
52 Patients were blinded to training status of the physicians. Furthermore, more female than male patients participated (ratio 2.8), in  
53 accordance with population-based epidemiological data and data from the Norwegian MS Registry, in which the female to male  
54 ratio ranged from 1.7 to 2.7,<sup>62</sup> suggesting that recruitment was not gender biased. The distribution of patient gender on pre- and  
55 post-intervention observations was similar. There was no attrition, so we had a complete set of data, and only one substitution  
56 among patients. The substitutes were also randomised, so an intention-to-treat analysis was not necessary.

1 There are also limitations. First, our small sample. With a larger sample we might have been able to show smaller effects. The  
2 premise of choosing a small trial and expecting a high effect size proved too optimistic. Secondly, the design of our study calls for  
3 caution in making causal inferences. As previous researchers have emphasized,<sup>63 64</sup> the link between physician training and patient  
4 recall is indirect, and mediated by what actually happened during information provision sequences in these meetings: In other  
5 words, the lack of an effect on recall could be due to a lack of change in how the information was provided, even though the  
6 amount was reduced. Such a result would implicate something lacking in the training *intervention*. Equally possible is that the  
7 physicians applied what they were taught, but that this had no effect on patient recall. This result would call into question the  
8 *content* of the training course, while highlighting the efficacy of its methods. It was also not feasible to do the study with patients  
9 in a real treatment escalation situation.

10 Recall was only measured immediately after the consultation. It would have been interesting to have additional patient recall  
11 results after an amount of time had passed. On the other hand, this might have led to a risk for contaminated results, as patients in  
12 the meantime may have discussed with others or read other information. There is also a risk that the fictitious situation would  
13 make the patients less prone to remember multiple facts, as they would not discuss details with spouse or relatives in order to  
14 actually choose a treatment.

15 The research team that made this analysis was, with the exception of JN, blinded to the intervention status of the transcripts from  
16 the consultations and recall interviews. Observer bias cannot be ruled out, although JN made efforts to ignore not being blind.  
17 Some results suggest the measurement is indeed valid; a) the measurement system was rigorously developed, yielding high inter-  
18 rater reliability,<sup>65</sup> b) there was no significant negative effect of increasing age within the age span 21 to 66 years on recall rate, and  
19 c) recall rate lessened with increased amount of information provided. These observations concur with findings in previous  
20 studies.<sup>47 66 67</sup>

21 We did not test pre-study health literacy, nor did we make a neuropsychological assessment of the participating patients. This was  
22 abstained because we feared it could be a stressor that might influence performance. In retrospect, post-visit assessments of health  
23 literacy might have shed additional light on our findings. Finally, all the participating physicians were volunteers, and we do not  
24 know their baseline skills or motivation. Motivated physicians<sup>46</sup> and physicians with lower skills benefit the most from training.<sup>68</sup>

## 51 CONCLUSION

52 We were able to demonstrate that a 3-hours course in providing complex information about treatment options to patients was  
53 sufficient to improve physicians' ability to prioritize information. We found a significant negative association between the amount  
54 of information provided and recall rate, supporting previous findings that information provision should be limited to what is most  
55 relevant to the individual patient. Despite these effects, we could not demonstrate that patient recall rate improved significantly

( $p=0.099$ ) in this study. There are still huge knowledge gaps in our understanding of what happens along all the steps from communication trainer to the physician to the patient's recall, and further research is needed in this field.

### **Practice points**

MS patients recalled less than 40% of information provided to them, and the recall percentage decreased the more information they received. Improving neurologists' ability to enhance patients' recall of complex information requires more extensive training than a 3-hour session including role-play practice.

## **DECLARATIONS**

### **Author contributions**

All authors contributed to the study conception and design. Material preparation were performed by Jenny Nordfalk, Pål Gulbrandsen and Trygve Holmøy. Data collection were performed by Jenny Nordfalk. All authors contributed to the analysis and interpretation of data. The calculations were performed by Owen Thomas. Jenny Nordfalk and Pål Gulbrandsen wrote the manuscript with input from all authors. All authors read and approved the final manuscript.

### **Acknowledgements**

We thank Reidun Førde and Henriette Høilund Kaupang for their contributions. We are grateful to Jonas Christoffer Lindstrøm for his contributions to this paper. We are grateful to all MS patients and neurologists who have participated in this study.

### **Ethics approval and consent to participate**

The project received ethics approval from the Data Protection Official for Research at Akershus University Hospital and have been performed in accordance with the ethical standards laid down in the World Medical Association Declaration of Helsinki and its later amendments. Sensitive data were protected by maintaining the Akershus University Hospital code of conduct in respect of storing data only within specified permitted access drives and using encrypted hardware.

The Regional Committee for Medical and Health Research Ethics (Southeast Norway) decided that this experiment is exempted from review. Date: March 24, 2015. Reference # 2015/161.

All participants gave their informed consent prior to their inclusion in the study. All participants were provided with information about the study prior to giving their written consent. Considering that the project involved informing patients about medications and risks related to a later stage of their disease, we involved an ethicist and a patient representative to discuss how to handle the

possibility of this causing worry or emotional reactions. As a result, we ensured that medical advice or psychological support was provided in case of need.

### Consent for publication

All patients and physicians have given written consent to publication of anonymized content.

### Declaration of competing interests

All authors declare that they have no competing interest.

### Data sharing

The data owner is Akershus University Hospital. Requests for anonymized data should be directed to co-author Professor Pål Gulbrandsen.

### Funding

This work was supported by EkstraStiftelsen Helse og Rehabilitering, which changed their name to Stiftelsen Dam, September 29, 2019 [grant number 7408].

## REFERENCES

1. Pardo G, Jones DE. The sequence of disease-modifying therapies in relapsing multiple sclerosis: safety and immunologic considerations. *J Neurol* 2017;264(12):2351-74. doi: 10.1007/s00415-017-8594-9 [published Online First: 2017/09/08]
2. Maarouf A, Boutiere C, Rico A, et al. How much progress has there been in the second-line treatment of multiple sclerosis: A 2017 update. *Rev Neurol (Paris)* 2018;174(6):429-40.
3. Myhr KM, Lehmann, A.K., Giæver, A., Gulowsen Celius, E., Thanh Tran, G., Espeset, K., Bø, L., Johnsen, L., Kampman, M., Enstad, M., Midgard, R., Holmoy, T. Nasjonal faglig retningslinje for diagnostikk, attack- og sykdomsmodifiserende behandling av multipel sklerose. (National MS guidelines) Helsedirektoratet (Norwegian directorate of health), 2017.
4. Ruiter Jd. Alignment in communication: towards a new theory of communication: Chpt. 5. Methodological paradigms in interaction research. Amsterdam ; Philadelphia: John Benjamins Publishing Company 2013:24-25.
5. Heesen C, Kleiter, I., Meuth, S. G., Kramer, J. Kasper, J., Kopke, S., Gaissmaier, W. Benefit-risk perception of natalizumab therapy in neurologists and a large cohort of multiple sclerosis patients. *J Neurol Sci* 2017;376:181-90. doi: 10.1016/j.jns.2017.03.001 [published Online First: 2017/04/23]
6. Heesen C, Kasper J, Segal J, et al. Decisional role preferences, risk knowledge and information interests in patients with multiple sclerosis. *Mult Scler* 2004;10(6):643-50. doi: 10.1191/1352458504ms1112oa [published Online First: 2004/12/09]
7. Thorne S, Con A, McGuinness L, et al. Health care communication issues in multiple sclerosis: an interpretive description. *Qual Health Res* 2004;14(1):5-22. doi: 10.1177/1049732303259618



- 1 8. Kopke S, Kern S, Ziemssen T, Berghoff M, Kleiter I, Marziniak M, Paul F, Vettorazzi E, Pottgen  
2 J, Fischer K, Kasper J, Heesen C. Evidence-based patient information programme in early  
3 multiple sclerosis: a randomised controlled trial. *J Neurol Neurosurg Psychiatry* 2014;85(4):411-8.  
4 doi: 10.1136/jnnp-2013-306441 [published Online First: 2013/10/10]
- 5 9. Somerset M, Campbell R, Sharp DJ, et al. What do people with MS want and expect from health-care  
6 services? *Health expectations : an international journal of public participation in health care and*  
7 *health policy* 2001;4(1):29-37. doi: 10.1046/j.1369-6513.2001.00111.x. [published Online First:  
8 2001/04/05]
- 9 10. Kopke S, Solari A, Khan F, et al. Information provision for people with multiple sclerosis. *The*  
10 *Cochrane database of systematic reviews* 2018(4):CD008757. doi:  
11 10.1002/14651858.CD008757.pub2 [published Online First: 2014/04/23]
- 12 11. Zolnierek KB, Dimatteo MR. Physician communication and patient adherence to treatment: a meta-  
13 analysis. *Med Care* 2009;47(8):826-34. doi: 10.1097/MLR.0b013e31819a5acc [published Online  
14 First: 2009/07/09]
- 15 12. Kortman B. Patient Recall and Understanding of Instructions Concerning Splints Following a Zone 2  
16 Flexor Tendon Repair. *Aust Occup Ther J* 1992;39(2):5-11.
- 17 13. Lewkovich GN, Haneline MT. Patient recall of the mechanics of cervical spine manipulation. *J*  
18 *Manipulative Physiol Ther* 2005;28(9):708-12. doi: 10.1016/j.jmpt.2005.09.014 [published Online  
19 First: 2005/12/06]
- 20 14. Pickney CS, Arnason JA. Correlation between patient recall of bone densitometry results and subsequent  
21 treatment adherence. *Osteoporos Int* 2005;16(9):1156-60. doi: 10.1007/s00198-004-1818-8  
22 [published Online First: 2005/03/04]
- 23 15. McCarthy DM, Waite KR, Curtis LM, et al. What did the doctor say? Health literacy and recall of  
24 medical instructions. *Med Care* 2012;50(4):277-82. doi: 10.1097/MLR.0b013e318241e8e1  
25 [published Online First: 2012/03/14]
- 26 16. Sandberg EH, Sharma R, Sandberg WS. Deficits in retention for verbally presented medical information.  
27 *Anesthesiology* 2012;117(4):772-9. doi: 10.1097/ALN.0b013e31826a4b02 [published Online First:  
28 2012/08/21]
- 29 17. Richard C, Glaser E, Lussier MT. Communication and patient participation influencing patient recall of  
30 treatment discussions. *Health expectations : an international journal of public participation in health*  
31 *care and health policy* 2017;20(4):760-70. doi: 10.1111/hex.12515 [published Online First:  
32 2016/11/22]
- 33 18. Demaree HA, DeLuca J, Gaudino EA, et al. Speed of information processing as a key deficit in multiple  
34 sclerosis: implications for rehabilitation. *J Neurol Neurosurg Psychiatry* 1999;67(5):661-3.
- 35 19. Chiaravalloti ND, DeLuca J. Cognitive impairment in multiple sclerosis. *The Lancet Neurology*  
36 2008;7(12):1139-51. doi: 10.1016/S1474-4422(08)70259-X [published Online First: 2008/11/15]
- 37 20. Bakirtzis C, Ioannidis P, Messinis L, et al. The Rationale for Monitoring Cognitive Function in Multiple  
38 Sclerosis: Practical Issues for Clinicians. *Open Neurol J* 2018;12:31-40. doi:  
39 10.2174/1874205X01812010031 [published Online First: 2018/07/17]
- 40 21. Grant I, McDonald WI, Trimble MR, et al. Deficient learning and memory in early and middle phases of  
41 multiple sclerosis. *J Neurol Neurosurg Psychiatry* 1984;47(3):250-5.
- 42 22. Rao SM, Leo GJ, Bernardin L, et al. Cognitive dysfunction in multiple sclerosis. I. Frequency, patterns,  
43 and prediction. *Neurology* 1991;41(5):685-91.
- 44 23. Rao JK, Anderson LA, Inui TS, et al. Communication interventions make a difference in conversations  
45 between physicians and patients: a systematic review of the evidence. *Med Care* 2007;45(4):340-9.  
46 doi: 10.1097/01.mlr.0000254516.04961.d5 [published Online First: 2007/05/15]
- 47 24. Watson PWB, McKinstry B. A systematic review of interventions to improve recall of medical advice in  
48 healthcare consultations. *J R Soc Med* 2009;102(6):235-43.
- 49 25. Griffin SJ, Kinmonth AL, Veltman MW, et al. Effect on health-related outcomes of interventions to alter  
50 the interaction between patients and practitioners: a systematic review of trials. *Ann Fam Med*  
51 2004;2(6):595-608. doi: 10.1370/afm.142 [published Online First: 2004/12/04]
- 52 26. Back A. Patient-physician communication in oncology: what does the evidence show? *Oncology*  
53 *(Williston Park)* 2006;20(1):67-74; discussion 77-8, 83. [published Online First: 2006/04/01]
- 54 27. Bertakis KD. The communication of information from physician to patient: a method for increasing  
55 patient retention and satisfaction. *J Fam Pract* 1977;5(2):217-22.

28. Ley P. Communicating with patients. 11 New Fetter Lane, London EC4P 4EE: Croom Helm Ltd 1988.
29. Bradshaw PW, Ley P, Kinsey JA. Recall of medical advice: comprehensibility and specificity. *Br J Soc Clin Psychol* 1975;14(1):55-62. [published Online First: 1975/02/01]
30. Reynolds PM, Sanson-Fisher RW, Poole AD, et al. Cancer and communication: information-giving in an oncology clinic. *Br Med J (Clin Res Ed)* 1981;282(6274):1449-51. [published Online First: 1981/05/02]
31. Langewitz W, Ackermann S, Heierle A, et al. Improving patient recall of information: Harnessing the power of structure. *Patient Educ Couns* 2015;98(6):716-21. doi: 10.1016/j.pec.2015.02.003 [published Online First: 2015/03/15]
32. Siegrist V, Langewitz, W., Mata, R., Maiori, D., Hertwig, R., Bingisser, R. The influence of information structuring and health literacy on recall and satisfaction in a simulated discharge communication. *Patient Educ Couns* 2018;101(12):2090-96. doi: 10.1016/j.pec.2018.08.008 [published Online First: 2018/08/23]
33. Lehmann V, Labrie NHM, van Weert JCM, et al. Provider caring and structuring treatment information to improve cancer patients' recall: Does it help? *Patient Educ Couns* 2020;103(1):55-62. doi: 10.1016/j.pec.2019.07.011 [published Online First: 2019/07/28]
34. Lehmann V, Labrie NHM, van Weert JCM, et al. Tailoring the amount of treatment information to cancer patients' and survivors' preferences: Effects on patient-reported outcomes. *Patient Educ Couns* 2020;103(3):514-20. doi: 10.1016/j.pec.2019.09.024 [published Online First: 2019/10/06]
35. Anderson JL, Dodman S, Kopelman M, et al. Patient information recall in a rheumatology clinic. *Rheumatol Rehabil* 1979;18(1):18-22.
36. Pugh K, Bergin D. Motivational Influences on Transfer. *Educ Psychol* 2006;41(3):147-60. doi: 10.1207/s15326985ep4103\_2 [published Online First: 08 Jun 2010]
37. Bol N, Smets EMA, Burgers JA, et al. Older Patients' Recall of Online Cancer Information: Do Ability and Motivation Matter More than Chronological Age? *Journal of health communication* 2018;23(1):9-19. doi: 10.1080/10810730.2017.1394400 [published Online First: 2017/12/12]
38. Apsler R, Sears DO. Warning, personal involvement, and attitude change. *J Pers Soc Psychol* 1968;9(2):162-6. [published Online First: 1968/06/01]
39. Maeland Ø. Annual Hospital Board Document, Akershus University Hospital Board, Norway. In: Board AUH, ed., 2018 2.
40. Gorelik L, Lerner M, Bixler S, et al. Anti-JC virus antibodies: implications for PML risk stratification. *Ann Neurol* 2010;68(3):295-303. doi: 10.1002/ana.22128
41. Plavina T, Subramanyam M, Bloomgren G, et al. Anti-JC virus antibody levels in serum or plasma further define risk of natalizumab-associated progressive multifocal leukoencephalopathy. *Ann Neurol* 2014;76(6):802-12. doi: 10.1002/ana.24286 [published Online First: 2014/10/03]
42. Schwab N, Schneider-Hohendorf T, Pignolet B, et al. Therapy with natalizumab is associated with high JCV seroconversion and rising JCV index values. *Neurol Neuroimmunol Neuroinflamm* 2016;3(1):e195. doi: 10.1212/NXI.0000000000000195 [published Online First: 2016/02/06]
43. Reuwer AQ, Heron M, van der Dussen D, et al. The clinical utility of JC virus antibody index measurements in the context of progressive multifocal leukoencephalopathy. *Acta Neurol Scand* 2017;136 Suppl 201:37-44. doi: 10.1111/ane.12840 [published Online First: 2017/10/27]
44. Dorr J, Paul F. The transition from first-line to second-line therapy in multiple sclerosis. *Curr Treat Options Neurol* 2015;17(6):354. doi: 10.1007/s11940-015-0354-5 [published Online First: 2015/04/29]
45. Torkildsen O, Myhr KM, Bo L. Disease-modifying treatments for multiple sclerosis - a review of approved medications. *Eur J Neurol* 2016;23 Suppl 1:18-27. doi: 10.1111/ene.12883
46. Fosli Jensen B, Gulbrandsen P, Dahl FA, et al. Effectiveness of a short course in clinical communication skills for hospital doctors: results of a crossover randomized controlled trial (ISRCTN22153332). *Patient Educ Couns* 2011;84(2):163-9. doi: 10.1016/j.pec.2010.08.028 [published Online First: 2010/11/06]
47. Ley P, Bradshaw PW, Eaves D, et al. A method for increasing patients' recall of information presented by doctors. *Psychol Med* 1973;3(2):217-20.
48. Kreuter MW, Bull FC, Clark EM, et al. Understanding how people process health information: a comparison of tailored and nontailored weight-loss materials. *Health Psychol* 1999;18(5):487-94. [published Online First: 1999/10/16]

- 1 49. Albada A, Ausems MG, Bensing JM, et al. Tailored information about cancer risk and screening: a  
2 systematic review. *Patient Educ Couns* 2009;77(2):155-71. doi: 10.1016/j.pec.2009.03.005  
3 [published Online First: 2009/04/21]
- 4 50. Nordfalk JM, Gulbrandsen P, Gerwing J, et al. Development of a measurement system for complex oral  
5 information transfer in medical consultations. *BMC Med Res Methodol* 2019;19(1):139. doi:  
6 10.1186/s12874-019-0788-7 [published Online First: 2019/07/06]
- 7 51. Degner LF. The Control Preferences Scale. *The Canadian journal of nursing research* 1997;29(3):21-43.
- 8 52. Elwyn G, Barr PJ, Grande SW, et al. Developing CollaboRATE: a fast and frugal patient-reported  
9 measure of shared decision making in clinical encounters. *Patient Educ Couns* 2013;93(1):102-7.  
10 doi: 10.1016/j.pec.2013.05.009 [published Online First: 2013/06/19]
- 11 53. Barr PJ, Thompson R, Walsh T, et al. The psychometric properties of CollaboRATE: a fast and frugal  
12 patient-reported measure of the shared decision-making process. *J Med Internet Res* 2014;16(1):e2.  
13 doi: 10.2196/jmir.3085 [published Online First: 2014/01/07]
- 14 54. Gulbrandsen P, Krupat E, Benth JS, et al. "Four Habits" goes abroad: report from a pilot study in  
15 Norway. *Patient Educ Couns* 2008;72(3):388-93.
- 16 55. Fosli Jensen B, Gulbrandsen P, Benth JS, et al. Interrater reliability for the Four Habits Coding Scheme  
17 as part of a randomized controlled trial. *Patient Educ Couns* 2010;80(3):405-9. doi:  
18 10.1016/j.pec.2010.06.032
- 19 56. Col NF, Solomon, A. J., Springmann, V., Garbin, C. P., Ionete, C., Pbert, L., Alvarez, E., Tierman, B.,  
20 Hopson, A., Kutz, C., Berrios Morales, I., Griffin, C., Phillips, G., Ngo, L. H. Whose Preferences  
21 Matter? A Patient-Centered Approach for Eliciting Treatment Goals. *Med Decis Making*  
22 2018;38(1):44-55. doi: 10.1177/0272989X17724434 [published Online First: 2017/08/15]
- 23 57. Szmuiłowicz E, el-Jawahri A, Chiappetta L, et al. Improving residents' end-of-life communication skills  
24 with a short retreat: a randomized controlled trial. *J Palliat Med* 2010;13(4):439-52. doi:  
25 10.1089/jpm.2009.0262 [published Online First: 2010/03/06]
- 26 58. Clayton JM, Butow, P. N., Waters, A., Laidsaar-Powell, R. C., O'Brien, A., Boyle, F., Back, A. L.,  
27 Arnold, R. M., Tulsy JA, Tattersall, M. H. . Evaluation of a novel individualised communication-  
28 skills training intervention to improve doctors' confidence and skills in end-of-life communication.  
29 *Palliat Med* 2012;27(3):236-43. doi: 10.1177/0269216312449683
- 30 59. Tarn DM, Paterniti DA, Orosz DK, et al. Intervention to enhance communication about newly  
31 prescribed medications. *Ann Fam Med* 2013;11(1):28-36. doi: 10.1370/afm.1417 [published Online  
32 First: 2013/01/16]
- 33 60. Kasper J, Liethmann, Katrin, Heesen, Christoph, Reissmann, Daniel R., Geiger, Friedemann. Training  
34 doctors briefly and in situ to involve their patients in making medical decisions-Preliminary testing  
35 of a newly developed module. *Health expectations : an international journal of public participation*  
36 *in health care and health policy* 2017;20(6):1254-63.
- 37 61. Ley P, Spelman MS. Communications in an out-patient setting. *Br J Soc Clin Psychol* 1965;4(2):114-6.  
38 [published Online First: 1965/06/01]
- 39 62. Kampman MT, Aarseth JH, Grytten N, et al. Sex ratio of multiple sclerosis in persons born from 1930 to  
40 1979 and its relation to latitude in Norway. *J Neurol* 2013;260(6):1481-8. doi: 10.1007/s00415-012-  
41 6814-x
- 42 63. Cegala DJ, Broz SL. Physician communication skills training: a review of theoretical backgrounds,  
43 objectives and skills. *Med Educ* 2002;36(11):1004-16. doi: DOI 10.1046/j.1365-2923.2002.01331.x
- 44 64. van Weel-Baumgarten E. Is linking research, teaching and practice in communication in health care the  
45 way forward? *Patient Educ Couns* 2016;99:1441-45. doi: <https://doi.org/10.1016/j.pec.2016.07.011>
- 46 65. Nordfalk JM, Gulbrandsen, P., Gerwing, J., Nylenna, M., Menichetti, J. Development of a measurement  
47 system for complex oral information transfer in medical consultations. *BMC Med Res Methodol*  
48 2019;19(1):139-48. doi: 10.1186/s12874-019-0788-7 [published Online First: 2019/07/06]
- 49 66. McGuire LC. Remembering what the doctor said: organization and adults' memory for medical  
50 information. *Exp Aging Res* 1996;22(4):403-28. doi: 10.1080/03610739608254020
- 51 67. Lundervold AJ, Wollschlager D, Wehling E. Age and sex related changes in episodic memory function  
52 in middle aged and older adults. *Scand J Psychol* 2014;55(3):225-32. doi: 10.1111/sjop.12114  
53 [published Online First: 2014/03/08]
- 54
- 55
- 56
- 57
- 58
- 59
- 60

- 1 68. Bylund CL, Banerjee SC, Bialer PA, et al. A rigorous evaluation of an institutionally-based  
2 communication skills program for post-graduate oncology trainees. *Patient Educ Couns*  
3 2018;101(11):1924-33. doi: 10.1016/j.pec.2018.05.026 [published Online First: 2018/06/09]  
4  
5  
6  
7  
8  
9  
10  
11  
12

## 13 **FIGURE LEGENDS**

- 14  
15  
16  
17  
18 Figure 1. Study Design Overview  
19 Figure 2. Data Collection Procedure  
20 Figure 3. CONSORT 2010 Participant Flow Diagram  
21  
22  
23  
24

## 25 **SUPPLEMENTARY FILES**

26  
27 Registered study record: ISRCTN trial 32248  
28  
29  
30  
31  
32  
33  
34  
35  
36  
37  
38  
39  
40  
41  
42  
43  
44  
45  
46  
47  
48  
49  
50  
51  
52  
53  
54  
55  
56  
57  
58  
59  
60

1  
2  
3  
4  
5  
6  
7  
8  
9  
10  
11  
12  
13  
14  
15  
16  
17  
18  
19  
20  
21  
22  
23  
24  
25  
26  
27  
28  
29  
30  
31  
32  
33  
34  
35  
36  
37  
38  
39  
40  
41  
42  
43  
44  
45  
46  
47  
48  
49  
50  
51  
52  
53  
54  
55  
56  
57  
58  
59  
60

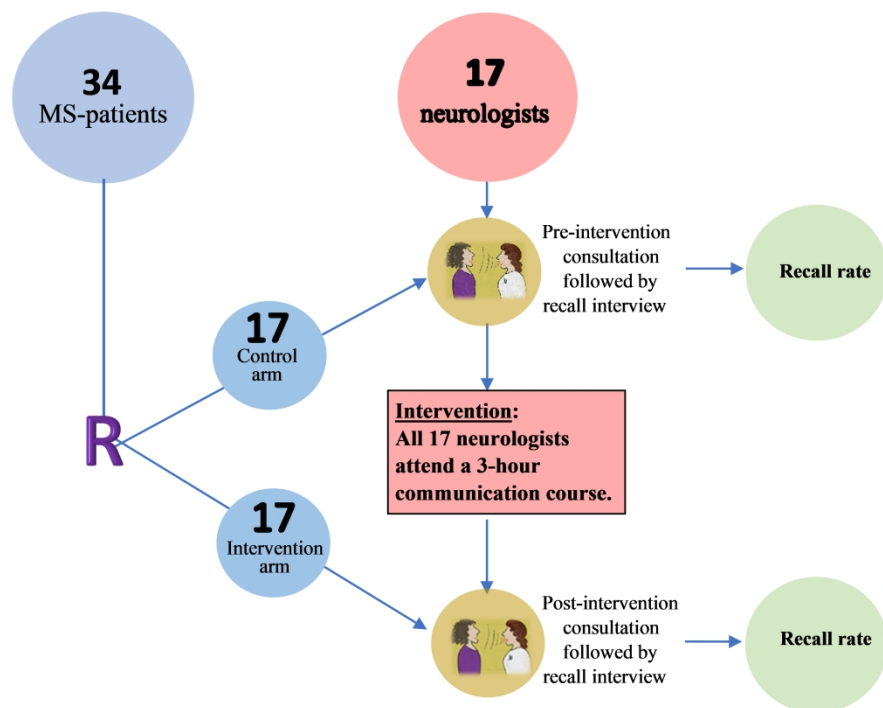

Figure 1. Study Design Overview

1015x720mm (95 x 95 DPI)



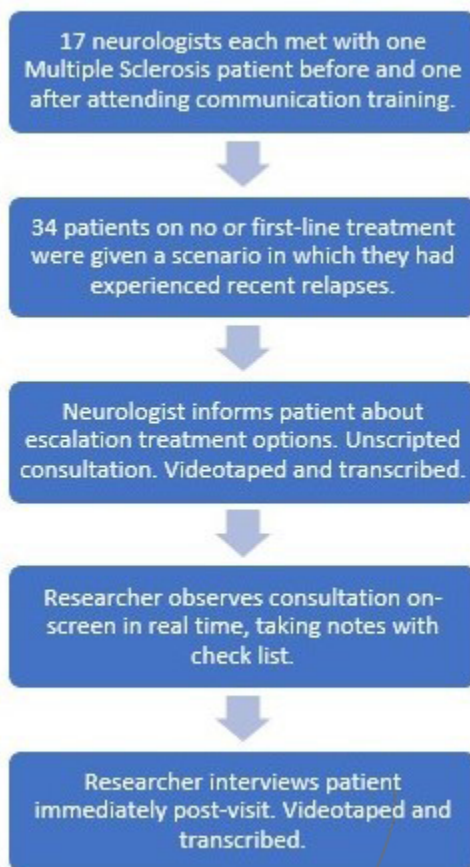

Figure 2. Data Collection Procedure

## CONSORT 2010 Flow Diagram

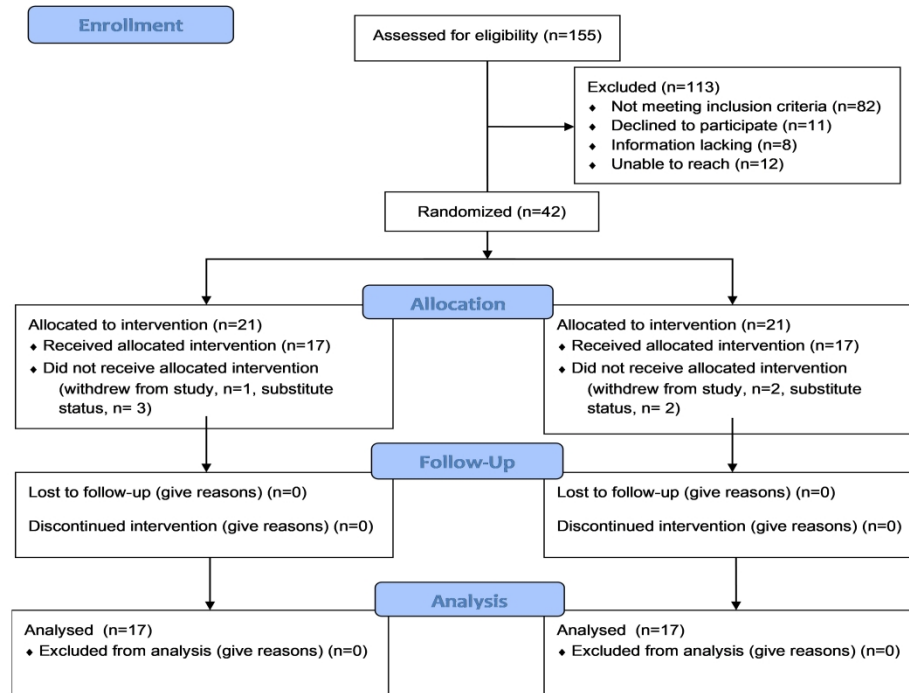

Figure 3. CONSORT 2010 Participant Flow Diagram

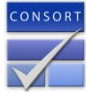

# CONSORT 2010 checklist of information to include when reporting a randomised trial\*

| Section/Topic                    | Item No | Checklist item                                                                                                                                                                              | Reported on page No |
|----------------------------------|---------|---------------------------------------------------------------------------------------------------------------------------------------------------------------------------------------------|---------------------|
| <b>Title and abstract</b>        |         |                                                                                                                                                                                             |                     |
|                                  | 1a      | Identification as a randomised trial in the title                                                                                                                                           | 1                   |
|                                  | 1b      | Structured summary of trial design, methods, results, and conclusions (for specific guidance see CONSORT for abstracts)                                                                     | 2                   |
| <b>Introduction</b>              |         |                                                                                                                                                                                             |                     |
| Background and objectives        | 2a      | Scientific background and explanation of rationale                                                                                                                                          | 3                   |
|                                  | 2b      | Specific objectives or hypotheses                                                                                                                                                           | 3-4                 |
| <b>Methods</b>                   |         |                                                                                                                                                                                             |                     |
| Trial design                     | 3a      | Description of trial design (such as parallel, factorial) including allocation ratio                                                                                                        | 4                   |
|                                  | 3b      | Important changes to methods after trial commencement (such as eligibility criteria), with reasons                                                                                          |                     |
| Participants                     | 4a      | Eligibility criteria for participants                                                                                                                                                       | 4                   |
|                                  | 4b      | Settings and locations where the data were collected                                                                                                                                        | 5                   |
| Interventions                    | 5       | The interventions for each group with sufficient details to allow replication, including how and when they were actually administered                                                       | 5                   |
| Outcomes                         | 6a      | Completely defined pre-specified primary and secondary outcome measures, including how and when they were assessed                                                                          | 6                   |
|                                  | 6b      | Any changes to trial outcomes after the trial commenced, with reasons                                                                                                                       |                     |
| Sample size                      | 7a      | How sample size was determined                                                                                                                                                              | 7                   |
|                                  | 7b      | When applicable, explanation of any interim analyses and stopping guidelines                                                                                                                |                     |
| <b>Randomisation:</b>            |         |                                                                                                                                                                                             |                     |
| Sequence generation              | 8a      | Method used to generate the random allocation sequence                                                                                                                                      | 7                   |
|                                  | 8b      | Type of randomisation; details of any restriction (such as blocking and block size)                                                                                                         | 7                   |
| Allocation concealment mechanism | 9       | Mechanism used to implement the random allocation sequence (such as sequentially numbered containers), describing any steps taken to conceal the sequence until interventions were assigned | 7                   |
| Implementation                   | 10      | Who generated the random allocation sequence, who enrolled participants, and who assigned participants to interventions                                                                     | 7                   |
| Blinding                         | 11a     | If done, who was blinded after assignment to interventions (for example, participants, care providers, those                                                                                |                     |



|    |                     |     |                                                                                                                  |                                                                                             |
|----|---------------------|-----|------------------------------------------------------------------------------------------------------------------|---------------------------------------------------------------------------------------------|
| 1  |                     |     | assessing outcomes) and how                                                                                      | 7                                                                                           |
| 2  |                     | 11b | If relevant, description of the similarity of interventions                                                      |                                                                                             |
| 3  | Statistical methods | 12a | Statistical methods used to compare groups for primary and secondary outcomes                                    | 7                                                                                           |
| 4  |                     | 12b | Methods for additional analyses, such as subgroup analyses and adjusted analyses                                 | 7                                                                                           |
| 5  |                     |     |                                                                                                                  |                                                                                             |
| 6  |                     |     | <b>Results</b>                                                                                                   |                                                                                             |
| 7  | Participant flow (a | 13a | For each group, the numbers of participants who were randomly assigned, received intended treatment, and         |                                                                                             |
| 8  | diagram is strongly |     | were analysed for the primary outcome                                                                            | 8,9                                                                                         |
| 9  | recommended)        | 13b | For each group, losses and exclusions after randomisation, together with reasons                                 | 9                                                                                           |
| 10 | Recruitment         | 14a | Dates defining the periods of recruitment and follow-up                                                          | 8                                                                                           |
| 11 |                     | 14b | Why the trial ended or was stopped                                                                               |                                                                                             |
| 12 | Baseline data       | 15  | A table showing baseline demographic and clinical characteristics for each group                                 | 8                                                                                           |
| 13 | Numbers analysed    | 16  | For each group, number of participants (denominator) included in each analysis and whether the analysis was      |                                                                                             |
| 14 |                     |     | by original assigned groups                                                                                      | 9                                                                                           |
| 15 | Outcomes and        | 17a | For each primary and secondary outcome, results for each group, and the estimated effect size and its            |                                                                                             |
| 16 | estimation          |     | precision (such as 95% confidence interval)                                                                      | 9                                                                                           |
| 17 |                     | 17b | For binary outcomes, presentation of both absolute and relative effect sizes is recommended                      |                                                                                             |
| 18 | Ancillary analyses  | 18  | Results of any other analyses performed, including subgroup analyses and adjusted analyses, distinguishing       |                                                                                             |
| 19 |                     |     | pre-specified from exploratory                                                                                   | 9                                                                                           |
| 20 | Harms               | 19  | All important harms or unintended effects in each group (for specific guidance see CONSORT for harms)            |                                                                                             |
| 21 |                     |     |                                                                                                                  |                                                                                             |
| 22 |                     |     | <b>Discussion</b>                                                                                                |                                                                                             |
| 23 | Limitations         | 20  | Trial limitations, addressing sources of potential bias, imprecision, and, if relevant, multiplicity of analyses | 10,11                                                                                       |
| 24 | Generalisability    | 21  | Generalisability (external validity, applicability) of the trial findings                                        | 10-12                                                                                       |
| 25 | Interpretation      | 22  | Interpretation consistent with results, balancing benefits and harms, and considering other relevant evidence    | 10-12                                                                                       |
| 26 |                     |     |                                                                                                                  |                                                                                             |
| 27 |                     |     | <b>Other information</b>                                                                                         |                                                                                             |
| 28 | Registration        | 23  | Registration number and name of trial registry                                                                   | ISRCTN trial<br>32248                                                                       |
| 29 | Protocol            | 24  | Where the full trial protocol can be accessed, if available                                                      |                                                                                             |
| 30 | Funding             | 25  | Sources of funding and other support (such as supply of drugs), role of funders                                  | EkstraStiftelsen<br>Helse og Reha-<br>bilitering (now<br>Stiftelsen Dam)<br>grant no. 7408. |
| 31 |                     |     |                                                                                                                  |                                                                                             |
| 32 |                     |     |                                                                                                                  |                                                                                             |
| 33 |                     |     |                                                                                                                  |                                                                                             |
| 34 |                     |     |                                                                                                                  |                                                                                             |
| 35 |                     |     |                                                                                                                  |                                                                                             |
| 36 |                     |     |                                                                                                                  |                                                                                             |
| 37 |                     |     |                                                                                                                  |                                                                                             |
| 38 |                     |     |                                                                                                                  |                                                                                             |
| 39 |                     |     |                                                                                                                  |                                                                                             |
| 40 |                     |     |                                                                                                                  |                                                                                             |
| 41 |                     |     |                                                                                                                  |                                                                                             |
| 42 |                     |     |                                                                                                                  |                                                                                             |

1 \*We strongly recommend reading this statement in conjunction with the CONSORT 2010 Explanation and Elaboration for important clarifications on all the items. If relevant, we also  
2 recommend reading CONSORT extensions for cluster randomised trials, non-inferiority and equivalence trials, non-pharmacological treatments, herbal interventions, and pragmatic trials.  
3 Additional extensions are forthcoming: for those and for up to date references relevant to this checklist, see [www.consort-statement.org](http://www.consort-statement.org).  
4  
5  
6  
7  
8  
9  
10  
11  
12  
13  
14  
15  
16  
17  
18  
19  
20  
21  
22  
23  
24  
25  
26  
27  
28  
29  
30  
31  
32  
33  
34  
35  
36  
37  
38  
39  
40  
41  
42

For peer review only

# Enabling shared decision making about treatment with multiple sclerosis patients: A preclinical intervention study

## Background

It is an ethical imperative of modern Western medicine for doctors to discuss treatment with their patients [1,2]. This activity is one of several elements included in the concept patient-centered care [3,4]. Two concepts are used, *shared decision making* (SDM) [5-9] and *informed decision making* (IDM) [10]. SDM is more widespread than IDM, and we will use that term in the following. SDM aims to support patients in deliberation and determination around decisions where there is equipoise.

Doctors strive to balance between paternalistic decision-making, appropriate information giving, more or less concealed persuasion or sometimes even complete handover of the decision to the patient [11]. Patients often get confused, particularly when they are given choices without sufficient information about the alternatives or about why the doctor asks them to decide. However, informed and active patients tend to adhere better to the chosen treatment and to be more satisfied with their healthcare [12]. The ability of doctors to practice the involvement of patients in decision making appropriately is still not widespread [13] and has led some critics to abandon the idea [14]. One reason could be that training programs in patient-centered care comprise too many general skills, and results are mixed [15]. This study aims to test simple SDM training initiatives focusing on information giving. New treatment options for multiple sclerosis patients introduce a complex information situation, well suited for development and testing of new, concrete improvements in SDM.

*Multiple sclerosis* (MS) is the most common disease cause of neurological disability among young adults in Western societies, affecting approximately 10,000 Norwegians [16]. The incidence is increasing, particularly among women [17]. The disease is characterized by an unpredictable course, and has a severe impact on health-related quality of life [18]. Untreated, the majority of patients will over the years develop secondary progressive disease with increasing and permanent disability.

Current immune modulatory treatment in MS may stop disease progression – no drug reverses

1  
2  
3 established disability [19]. Treatment must therefore start early, before permanent disability  
4 develops [20]. Available drugs differ in efficacy, risk/adverse effect profile and administration  
5 form. Direct comparisons of effects are complicated as head-to-head studies are generally  
6  
7 lacking. Figure 1 illustrates reduced relapse rate versus drug associated risk for serious  
8  
9  
10  
11  
12  
13  
14  
15  
16  
17  
18  
19  
20  
21  
22  
23  
24  
25  
26  
27  
28  
29  
30  
31  
32  
33  
34  
35  
36  
37  
38  
39  
40  
41  
42  
43  
44  
45  
46  
47  
48  
49  
50  
51  
52  
53  
54  
55  
56  
57  
58  
59  
60

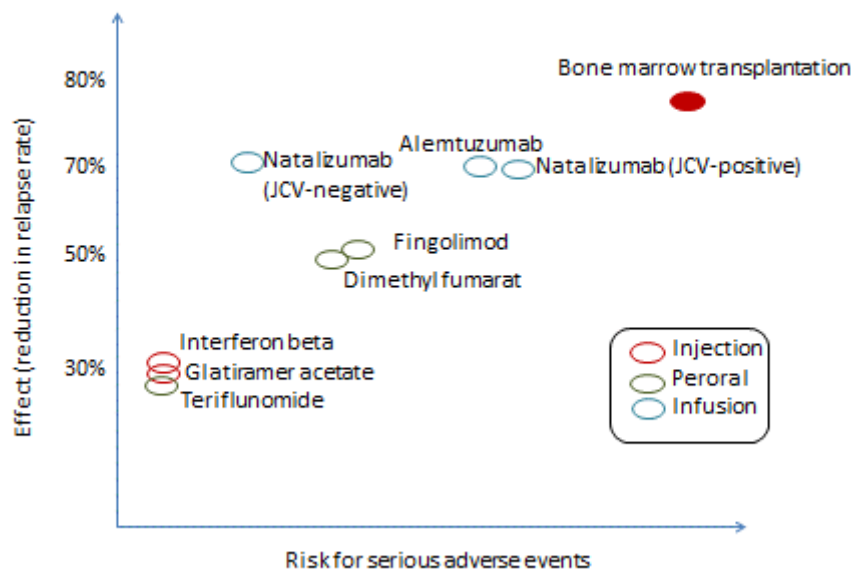

36 MS patients will need to be informed about different effect sizes, infrequent and very different  
37 serious adverse effects (heart block, hemophagocytic syndrome, encephalitis, progressive  
38 multifocal encephalopathy, impairment of vision (macular oedema), possible increased cancer  
39 risk) related to the drug alternatives, and all in light of limited experience due to short  
40 observation time for the new drugs (compared to the duration of MS) [21-25]. The complexity  
41 of the information is reflected in frequent updates of the Norwegian Health Directory  
42 guidelines for MS treatment. According to the Norwegian Health Directory guidelines for MS  
43 treatment most patients should initially be treated with glatiramer acetate, interferon beta 1a/b,  
44 teriflunomide or dimethyl fumarate[21]. Fingolimod, natalizumab and alemtuzumab should be  
45 used as escalation therapy if first line drugs fail, and from the beginning in a minority of  
46 patients with severe disease. There is, however, room for interpretation in individual cases,  
47 reflected in extensive difference in the use of disease modifying MS drugs between counties  
48 in Norway. According to the prescription registry, both the total use and the ratio between the

1  
2  
3 different drug classes differ by more than 50%. These differences cannot be explained by  
4 differences in prevalence or incidence, which is quite uniform across Norway [26]. They are  
5 therefore likely to reflect differences in doctor (and, less likely, patient) preferences and in  
6 tradition related to decision making, and should give rise to ethical concern.  
7  
8  
9

10  
11  
12  
13 *Decision making.* The decision on initiating MS treatment is a process involving both the  
14 neurologist and the patient, and in many cases also other actors like MS nurses, relatives and  
15 friends. There are several factors that make this choice difficult for patients: First, it requires  
16 knowledge about the individual prognosis as well as the pros and cons of the treatment  
17 options. Second, the decision often has to be made in a period of emotional chaos and distress.  
18 In order to involve the patient, the doctor must provide sufficient information. On the other  
19 hand, too detailed or otherwise poorly communicated information may enhance uncertainty  
20 and despair, and thereby reduce the patient's capacity or wish to be involved in the decision  
21 making. The complexity of this decision is reflected by research in Italy and Germany  
22 [27,28], with an emphasis on patient information. The task calls for doctors who are well  
23 skilled in patient-centered care and SDM.  
24  
25  
26  
27  
28  
29  
30  
31  
32  
33  
34  
35

36  
37 SDM in medicine is a rapidly growing research field. Most studies on medical decisions and  
38 patient-doctor communication have been performed to assess the degree of patient  
39 involvement. SDM studies are predominantly descriptive, combining observation of real  
40 doctor-patient encounters with patient reported outcomes (mainly various satisfaction scores)  
41 after such encounters. Experimental studies are few. Interventions are either more general  
42 training in patient-centered care and/or SDM (also done by our group with success [29]), or  
43 various preparations of patients (decision aids, pre-encounter information etc) [30]. Training  
44 often aims to alter physicians' behaviour by introducing a set of skills, and it is usually  
45 difficult to determine exactly which element that explains observed effects on patients. We  
46 have not found intervention studies based on the changing of one particular skill.  
47 Measurements are also a challenge, and low correlation between instruments of conceptual  
48 similarity has been observed [31]. A new promising instrument (MAPPIN'SDM) which  
49  
50  
51  
52  
53  
54  
55  
56  
57  
58  
59  
60

1  
2  
3 encompasses observations of the decision making process from three angles, the doctor, the  
4 patient, and the observer, has been developed recently by a research group we have initiated  
5 collaboration with [32].  
6  
7  
8  
9

10  
11 In the case of deciding whether to start second line treatment in MS, the main challenge is to  
12 convey sufficient information in a way the patient can handle in that emotional situation.

13  
14 Unpublished qualitative observations in our own large dataset [29] suggest that this requires  
15 that the doctor prioritizes, rations, and portions the information.  
16  
17  
18  
19

- 20  
21 - Prioritize: Decide up-front which information that the patient must have in order to be  
22 sufficiently informed.  
23
- 24  
25 - Portion: Allow a micropause (1-2 seconds) after each sentence to check visually if the  
26 patient follows, also providing an opportunity for immediate questions.  
27  
28
- 29  
30 - Ration: During the consultation, assess – given the patient’s emotional state, questions  
31 and the time available – how much additional information to provide there and then,  
32 and what and when to provide more.  
33  
34  
35  
36  
37

38  
39 Of note, this approach is not contradictory to patient-centered communication and shared  
40 decision-making. The point is that the doctor has to be more thoughtful about his information  
41 giving up-front, and equally aware of the patient’s reactions under way. He is also instructed  
42 to use clearer sentences and fewer words. By doing so, there is less room for assumptions  
43 about the patient and more room for the patient to question.  
44  
45  
46  
47  
48  
49

50  
51 We propose that a simple intervention where the doctor changes just this part of the  
52 communication could render high effect on patient take-up, understanding, and ability to  
53 decide what to do. If we can provide evidence that very simple and highly specific changes in  
54 communication helps patients and doctors in this challenging situation, it will potentially  
55 improve the care of MS patients, and may also provide a model for clinicians in other fields in  
56  
57  
58  
59  
60

1  
2  
3 corresponding situations.  
4  
5  
6

7 *A new type of translational research.* It is rare to see health services intervention studies with  
8 trials in different phases, analog to drug effect studies. In communication research it has  
9 hardly ever been done. We think it is necessary to conduct proof-of-principle studies in  
10 laboratories before implementation in large scale trials. In real – and difficult – clinical  
11 situations, it is unlikely that patients, or doctors, will accept to participate in behaviour  
12 intervention studies unless prior studies under controlled conditions have shown promising  
13 effects. Hence, this proposal is about trying out a behaviour intervention in a lab in order to  
14 explore whether this intervention is worthwhile studying in a clinical trial.  
15  
16  
17  
18  
19  
20  
21  
22  
23  
24

### 25 **Aim of the project**

26 The overall aim of this project is to improve patients' involvement in decision making by  
27 introducing small, highly specific behaviour changes of doctors, using the initiation of MS  
28 treatment as an example.  
29  
30  
31

32 Specific subgoals are:

- 33 1) To develop a consensus based fact sheet through involvement of an ethicist,  
34 neurologists and patient representatives, that designates which information should be  
35 given priority in consultations about treatment choices, built on updated knowledge  
36 from clinical trials and clinical registries on treatment effects and side effects, and  
37 guidelines of evidence based patient information.  
38  
39  
40  
41  
42  
43  
44  
45
- 46 2) To observe how doctors communicate treatment options to MS patients, in order to  
47  
48 (a) Describe today's typical behaviour related to MS treatment decisions, and  
49 use this as a validity check for the non-intervention arm in the behavioural  
50 experiment.  
51  
52  
53  
54
- 55 3) To test the effect of a simple, highly specific communication intervention, established  
56 through instructions to doctors, on patients' information uptake, understanding,  
57 willingness and ability to make a decision in a communication lab, including  
58  
59  
60

- 1  
2  
3 (a) The main effect study.  
4  
5 (b) A study that evaluates the ability of the doctors to adhere to the taught  
6  
7 intervention.  
8  
9

## 11 **Methods**

12 Subgoal 2 is covered by study 1, subgoals 1 and 3 by study 2.  
13  
14  
15  
16

### 17 ***Study 1 – Observation of current practice and preparation for experimental study***

18 We will videotape at least six encounters with different doctors and patients. Videotapes will  
19 be used to describe which information patients are given, and how, using qualitative analysis  
20 according to Miller & Crabtree [33], and based on observation of specific elements in the  
21 Four Habits Coding Scheme (4HCS) [34]. The 4HCS is suitable for measurement of  
22 patient-centered behaviour. This real encounter measurement will be compared with the  
23 nonintervention arm encounter measurements in study 2 to see if the experimental situation  
24 diverges much from a normal situation regarding patient-centered behaviour.  
25  
26  
27  
28  
29  
30  
31  
32  
33  
34  
35

36 Right after the encounter, the patients will be interviewed by a researcher, who uses a  
37 structured interview to map the patient's information uptake, understanding and thoughts  
38 about the decision. Doctors will also be interviewed about their experiences in the  
39 consultations. The study will be used to inform the creation of the fact sheet (see study 2).  
40  
41  
42  
43  
44  
45  
46

47 We will include doctors for study 2 among doctors in study 1. Criteria are that we do see a  
48 potential for improvement on information giving (habit 4 in 4HCS), and that they have an  
49 acceptable standard regarding ability to manage emotional issues (habit 3 in 4HCS). The latter  
50 is necessary because in this particular study we do not want to manipulate the affective part of  
51 the doctors' communication style, and need to have reasonably well-functioning doctors in  
52 that respect. In an exploratory study this is necessary, while in a large scale trial it is not. Any  
53 exclusion will be on very strict criteria, e.g. extremely poor empathic performance or  
54  
55  
56  
57  
58  
59  
60



1  
2  
3 extremely well-functioning information giving (which leaves little or no room for  
4 improvement). Our assumption is that all six doctors will satisfy inclusion criteria for study 2.  
5  
6 We might need to add encounters until we have a sufficient number of doctors.  
7  
8  
9

10  
11 Publications from study 1: 1-2 qualitative articles that include quantitative assessments in a  
12 communication journal (Patient Education and Counseling) or MS journal.  
13  
14  
15

### 16 17 ***Study 2 – The experimental study***

18  
19 A panel of an ethicist, experienced neurologists with MS expertise and MS patient  
20 representatives (volunteers from the Norwegian MS Society have confirmed willingness) will  
21 prepare a fact sheet describing in detail a) the crucial information that has to be given to the  
22 patient, and b) optional information that may be given as a result of the natural development  
23 of an encounter in which treatment options are presented. Available guidelines will be used,  
24 and experience gathered from interviewing patients in study 1 will be taken into account.  
25  
26  
27  
28  
29  
30  
31  
32

33 *Intervention:* Participating doctors will meet patients in a communication lab. The doctors  
34 will first perform encounters with their current information giving style. Then they will be  
35 exposed to a short training session focusing on improved information giving, using  
36 prioritization, portioning, and rationing. Afterwards, they will perform encounters using this  
37 method.  
38  
39  
40  
41  
42  
43  
44

45 *Participating patients:* We will include relapsing remitting MS patients that currently use any  
46 of the first line drugs, and who have not previously been exposed to the decision to begin with  
47 a second-line drug. Patients will be identified in the electronic patient records at Akershus  
48 University Hospital (AHUS), and invited to participate through mail. They will serve as  
49 proxies for patients in a real choice situation.  
50  
51  
52  
53

54 Reasons for choosing such patients are that

- 55 - It is very hard for a healthy person to imagine how it is to be an MS patient.
  - 56 - MS patients treated with first line drugs represent a subgroup of patients that could be
- 57  
58  
59  
60

1  
2  
3 eligible for second line treatment, and are therefore as close to the target population as  
4 possible.  
5  
6  
7

- 8  
9 - Real patients would be too few within the time frame of this part of the study, which  
10 has to be performed in a single center because of the need for a lab facility.  
11  
12  
13  
14

15 The use of MS patients that are not in a real choice situation could lead to less information  
16 uptake (“this is not that important for me”) or higher information uptake (being less  
17 emotionally involved). So to use such patients is a trade-off, in which we balance feasibility  
18 (experimental control, small scale trial, costs) with validity. In our opinion, a large scale  
19 multicentre trial where doctors in several sites need training and real patients are involved, is  
20 prohibitive unless we have clear indications that the behavioural change we want to induce is  
21 possible and proves to improve patients’ information take-up and ability to participate in the  
22 treatment decision.  
23  
24  
25  
26  
27  
28  
29  
30  
31  
32

33 *Sample size estimation:* We want to document a strong effect, as we think this is necessary to  
34 convince future doctors to accept and adapt such a behavioural change. We expect a strong  
35 effect from the present intervention, since it is simple to learn and tailored to the selected  
36 patient population. The scale of measurement will be developed for the present project, so the  
37 numerical effect size, as well as its natural variability, is unknown (see outcome variables).  
38 Our best guess is that the average effect of the intervention will be similar to the standard  
39 deviation of the measured effect. Under standard assumptions of a two-sided t-tests of  
40 statistical significance at the 5% and 80% power, this gives 16 patients in each arm of the  
41 study.  
42  
43  
44  
45  
46  
47  
48  
49  
50  
51

52 *Preparation of doctor:* The study doctor needs to remember the fact sheet information. The  
53 doctor is instructed that the encounter follows recent information about the disease activity of  
54 this patient, that warrants a discussion about whether to start with second line drugs or not.  
55  
56  
57

58 *Preparation of proxy patient:* The patient is told that the study is about how the doctor  
59  
60

1  
2  
3 communicates (but not anything specifically about the concrete intervention and aim). They  
4 are instructed to imagine that the current meeting is a real one, although the doctor will  
5 present them to information that is not real. Written informed consent is to be acquired at this  
6 point.  
7  
8  
9

10  
11  
12  
13 *Randomization:* Participating proxy patients are randomized to receive normal or intervention  
14 doctor behaviour, and scheduled to meet in the lab accordingly.

15  
16  
17 *Encounter:* The doctor has 20 minutes to his disposal to inform the patient. The encounter is  
18 filmed, while the researcher simultaneously observes which information that is given. The  
19 doctor will not be interrupted if he exceeds the time limit, and encounter duration will be  
20 measured (confounding variable).  
21  
22  
23

24  
25  
26  
27 *Post-encounter interview:* The researcher performs a structured interview with the patient,  
28 with primary purpose to describe as precisely as possible what the patient remembers of the  
29 information he/she received, how the information is understood, whether he/she feels  
30 equipped to make a decision, and how the patient feels about this decision. The interview is  
31 filmed (for documentation/validation purposes), but concrete data are entered in a prepared  
32 data sheet by the researcher during the interview. In addition, the patient will complete a  
33 recently developed risk knowledge questionnaire (RIKNOW)  
34 (<http://www.automsproject.org/>) which we are allowed to use by our collaborator Jürgen  
35 Kasper.  
36  
37  
38  
39  
40  
41  
42  
43  
44  
45  
46

47 *Post-encounter questionnaires:* The patient and the doctor complete post-encounter electronic  
48 questionnaires about emotions during the interview [35-37]. These data will be used as  
49 independent variables in predictive analyses.  
50  
51  
52  
53

54  
55 *Video coding:* The doctor-patient encounter is coded for quality of SDM using either the  
56 OPTION instrument [38] or more likely the MAPPIN'SDM instrument [32], and The Four  
57 Habits Coding Scheme [34]. The doctor's use of specific intervention techniques is measured  
58  
59  
60

1  
2  
3 in frequencies and seconds (main explanatory variable). The adherence of the doctor to the  
4 priority facts in the fact sheet is measured on a novel scale developed for this purpose  
5 (confounding variable). We have not found any similar measure in the relevant literature that  
6 could be used for our purpose. We currently perform a qualitative study on existing video  
7 material from AHUS, led by postdoc Jennifer Gerwing (see study resources). In that study we  
8 identify communication content and clarity in doctor information giving. Her expertise will  
9 inform the development of the proposed scale.  
10  
11  
12  
13  
14  
15  
16  
17  
18

19 *Analysis:* We will use a standard RCT to determine effect of the intervention, with multilevel  
20 approach accounting for interdependency between encounters made by the same doctor. We  
21 will also do a secondary analysis using standard linear regressions to determine predictors of  
22 patient post-encounter knowledge agreement with fact sheet, and predictors of adherence of  
23 the doctors to the prescribed behaviour.  
24  
25  
26  
27  
28  
29  
30

31 *Outcome variables in RCT:*

- 32  
33 1. The main outcome variable is a measure of patient knowledge about crucial  
34 information (as predefined by the fact sheet). The RIKNOW questionnaire, or an  
35 adjustment of this (following agreement about contents of the fact sheet), will be used.  
36 In addition, as a validity check, the patient's knowledge of prioritized facts is  
37 compared to the fact sheet on a scale (5-point from no agreement to high agreement)  
38 by a statistician that does not know which arm the data comes from.  
39  
40  
41  
42  
43  
44  
45  
46 2. Other outcome variables  
47  
48 a. Patient evaluation of ability to be involved in the decision  
49  
50 b. Patient satisfaction with the doctor's communication about the decision  
51  
52  
53  
54

55 Of note, we will not perform pre-encounter knowledge tests of the patients, as this could  
56 influence the encounters. Randomisation should in principle secure that this does not bias the  
57 results.  
58  
59  
60

1  
2  
3 *Publications from study 2:* Two publications planned to be published. The effect study will be  
4 submitted to a major clinical journal. The study about doctor adherence to the fact sheet will  
5 be submitted to a journal about medical education or communication.  
6  
7  
8  
9

10  
11 *Secondary analyses:* We aim to publish 1-2 papers on predictors of change.  
12  
13  
14

### 15 **Timeline, ethics, etc.**

16  
17 2014 The ethics committee application will be prepared and submitted before the start of the  
18 funding applied for in this proposal.  
19

20  
21 2015 Prepare electronic questionnaires. Prepare measurement scales and fact sheet.  
22  
23 Recruitment for study 1 and study 1 data collection. Preparations for study 2.  
24

25 2016 Submit paper from study 1. Study 2 data collection, videotape coding and starting  
26 analyses of study 2.  
27

28  
29 2017 Submit papers from study 2. Beginning secondary analysis. Submit thesis.  
30

31 The study may extend into 2018 depending on recruitment of the PhD candidate.  
32  
33  
34

### 35 **Contribution to science and society**

36  
37 Experimental studies on concrete, limited clinical communication behaviours, specifically  
38 aimed at improving patients' understanding and thereby helping their involvement in  
39 decisions, have previously not been conducted. We hope this approach will lead to better  
40 insight in the direct link between information giving skills and information transfer in clinical  
41 work. We also aim to provide a new way of thinking in communication skills studies, with  
42 experimental studies preceding clinical trials, thereby bringing this field closer to the level of  
43 drug testing.  
44  
45  
46  
47  
48  
49

50  
51  
52 Decisions about long-term treatment have the potential to consume or save resources as the  
53 drug regimens may amount to high costs. It is not only in the patient's and the doctor's  
54 interest, but also in the interest of the society that these decisions are made as properly as  
55 possible.  
56  
57  
58  
59  
60

### **Study group and resources**

Principal investigator: Pål Gulbrandsen is professor of health services research at the University of Oslo (UiO) and AHUS, and has published more than 80 original papers, mostly on the doctor-patient relationship and doctor-patient communication. He has built a research group at AHUS with one completed PhD (plus two in other clinical areas) and three current PhD students studying clinical communication. He also initiated, with professor Arnstein Finset at Dept. of Behavioural Sciences (UiO), the Oslo Communication in Healthcare Education and Research group (OCHER, see [www.ocher.no](http://www.ocher.no)), which is the second largest group in the field in Europe.

Trygve Holmøy is a consultant and professor at Department of Neurology at AHUS. His main research interest is multiple sclerosis. He has supervised five PhD students that have completed their PhD theses during the last years, and has large experience with treating MS patients. He has participated extensively in the development of this project. He will participate in recruitment of patients and doctors, and co-supervise the PhD student.

Fredrik A. Dahl is a senior researcher at AHUS with a PhD in informatics and a postdoctoral in statistics. He has been an important contributor to several clinical studies in AHUS included a previous crossover randomised controlled trial testing the effect of communication skills training. He will supervise the statistical analysis and qualify the randomization procedures. He will have an important role in the secondary analyses, in which the PhD student is not expected to be the first author.

Jennifer Gerwing is a research psychologist and a postdoctoral student at AHUS. She is also affiliated with the University of Victoria, Canada, and has extensive experience with lab studies on clinical communication. She will supervise the video analyses.

### *External collaborators*

Jürgen Kasper is professor at the University of Tromsø and an experienced psychologist with

1  
2  
3 several years of studies of medical decision making. He is an important collaborator in the  
4 project “Autonomy preferences, risk knowledge and decision-making performance in multiple  
5 sclerosis patients”. His contribution will be his knowledge base in this particular field.  
6  
7  
8  
9

10  
11 Edward Krupat is professor of evaluation at Harvard Medical School, Boston, US. He is a  
12 social psychologist with large expertise in development of instruments for the evaluation of  
13 behaviours, and a collaborator of Pål Gulbrandsen for nine years. He will assist the  
14 development of measurements.  
15  
16  
17  
18  
19

20  
21 Kjell-Morten Myhr has for several years headed the Norwegian Competence Center for  
22 Multiple Sclerosis at Haukeland University Hospital, where he now is a full professor and  
23 consultant in neurology. He has extensive experience in MS research and clinical practice,  
24 including clinical trials. He has headed the development of official Norwegian guidelines for  
25 treatment of MS. He will participate in development of the fact sheet and in interpretation of  
26 the data.  
27  
28  
29  
30  
31  
32  
33

34  
35 Reidun Førde is a professor in medical ethics at the University of Oslo and has for years  
36 worked with problems related to the involvement of patients in decisions about treatment. She  
37 will assist in development of the fact sheet.  
38  
39  
40  
41  
42

43 The expertise of all people mentioned above will be used in the project. The current proposal  
44 aims to fund one PhD student, preferably a medical doctor, to run the data collection and  
45 deliver a following thesis. This student will be recruited by public announcement.  
46  
47  
48  
49

## 50 **Costs**

51  
52 AHUS covers expenses related to all listed internal collaborators, estimated to about NOK  
53 500,000 over 3 years. AHUS also covers traveling costs for proxy patients (estimated to max  
54 NOK 10,000), development of electronic data sheets (equivalent of 30 hours), and estimated  
55 costs related to time used for participating doctors (equivalent of 50 hours). No expenses are  
56  
57  
58  
59  
60

1  
2  
3 related to the external collaborators. However, there is need to employ video coders, and they  
4 need to be trained. We estimate the costs for this training to NOK 100,000. The PhD  
5 candidate should attend two international conferences annually (in Europe and the US), for  
6 which we estimate the average cost to be NOK 10,000, amounting to NOK 60,000.  
7  
8  
9  
10

11  
12  
13 At our disposal we have a new communication observation lab inside the hospital, with state  
14 of the art equipment delivered by Noldus Inc., Wageningen, the Netherlands. This equipment  
15 is provided by the Institute of Clinical Medicine at the University of Oslo. The Dept of  
16 Neurology at AHUS has a catchment area of 450,000 people and the responsibility of  
17 approximately 700 MS patients (the number of newly diagnosed patients in 2011 and 2012  
18 were 35 and 51, respectively).  
19  
20  
21  
22  
23  
24  
25  
26

## 27 References

- 28  
29 1. Stiggelbout AM, Van der Weijden T, De Wit MPT et al. Shared decision making: really  
30 putting patients at the centre of healthcare. *BMJ* 2012; 344: e256.
- 31  
32 2. Lov om pasient- og brukerrettigheter. <http://lovdata.no/dokument/NL/lov/1999-07-02-63>.
- 33  
34 3. Stewart M, Brown JB, Weston WW, McWhinney IR, McWilliam CL, Freeman TR, eds.  
35 Patient-Centered Medicine. Transforming the Clinical Method. Thousand Oaks, CA: SAGE  
36 Publications; 1995.
- 37  
38 4. Epstein RM, Morse DS, Williams GC, leRoux P, Suchman, AL, Quill TE. Clinical Practice  
39 and the Biopsychosocial Approach. In Frankel RM, Quill TE, McDaniel SH, eds. The  
40 Biopsychosocial Approach: Past, Present, Future. Rochester, NY: University of Rochester  
41 Press; 2003:33-66.
- 42  
43 5. Barry MJ, Edgman-Levitan S. Shared Decision Making – The Pinnacle of Patient-Centered  
44 Medicine [Perspective]. *N Engl J Med*. 2012; 366:780-1. President's commission for the study  
45 of ethical problems in medicine and biomedical and behavioral research: Making health care  
46 decisions. Washington DC: US Government Printing Office, 1982.
- 47  
48 6. Charles C, Gafni A, Whelan T. Shared decision-making in the medical encounter: what  
49 does it mean? (or it takes at least two to tango). *Soc Sci Med* 1997;44:681-92.
- 50  
51 7. Makoul G, Clayman ML. An integrative model of shared decision making in medical  
52 encounters. *Patient Educ Couns* 2006;60:301-12.
- 53  
54 8. Elwyn G, Frosch D, Thomson R, Joseph-Williams N, Lloyd A, et al. Shared decision  
55 making: A model for clinical practice. *J Gen Intern Med* 2012; 27: 1361-7.
- 56  
57 9. Salzburg Global Seminar. Salzburg statement on shared decision making. *BMJ*  
58 2011;342:1745.  
59  
60



10. Braddock CH3rd, Fihn SD, Levinson W, Jonsen AR, Pearlman RA. How doctors and patients discuss routine clinical decisions: informed decision making in the outpatient setting. *J Gen Intern Med.* 1997;12:339-45.
11. Shaw D, Elger B. Evidence-based persuasion. An ethical imperative. *JAMA* 2013; 309: 1689-90..
12. Zolnierek KBH, DiMatteo MR. Physician communication and patient adherence to treatment: A meta-analysis. *Med Care* 2009; 47: 826-34.
13. Gulbrandsen P, Landmark Dalby AM, Ofstad EH, Gerwing J. Confusion in and about shared decision making in hospital encounters. (submitted)
14. Pilnick A, Dingwall R. On the remarkable persistence of asymmetry in doctor/patient interaction: A critical review. *Soc Sci med* 2011; 72: 1374-82.
15. Dwamena F, Holmes-Rovner M, Gaulden CM et al. Interventions for providers to promote a patient-centred approach in clinical consultations. *Cochrane Database Syst Rev* 2012; 12: CD003267.
16. Compston A, Coles A (2002) Multiple sclerosis. *Lancet* 359: 1221-1231.
17. Kampman MT, Aarseth JH, Grytten N, Benjaminsen E, Celius EG, Dahl OP, Holmoy T, Loken-Amsrud K, Midgard R, Myhr KM, Risberg G, Vatne A, Torkildsen O (2013) Sex ratio of multiple sclerosis in persons born from 1930 to 1979 and its relation to latitude in Norway. *J Neurol* . 10.1007/s00415-012-6814-x [doi].
18. Beiske AG, Naess H, Aarseth JH, Andersen O, Elovaara I, Farkkila M, Hansen HJ, Mellgren SI, Sandberg-Wollheim M, Sorensen PS, Myhr KM (2007) Health-related quality of life in secondary progressive multiple sclerosis. *Mult Scler* 2007; 13: 386-392.
19. Holmoy T, Celius EG (2011) [Development of new therapies for multiple sclerosis]. *Tidsskr Nor Laegeforen* 2011; 131:832-836.
20. Miller DH, Chard DT, Ciccarelli O (2012) Clinically isolated syndromes. *Lancet Neurol* 11: 157-169. S1474-4422(11)70274-5 [pii];10.1016/S1474-4422(11)70274-5 [doi].
21. Helsedirektoratet (2011) Nasjonal faglig retningslinje for diagnostikk, attacke- og sykdomsmodifiserende behandling av multippel sklerose.
22. Polman CH, O'Connor PW, Havrdova E, Hutchinson M, Kappos L, Miller DH, Phillips JT, Lublin FD, Giovannoni G, Wajgt A, Toal M, Lynn F, Panzara MA, Sandrock AW (2006) A randomized, placebo-controlled trial of natalizumab for relapsing multiple sclerosis. *N Engl J Med* 354: 899-910.
23. Kappos L, Antel J, Comi G, Montalban X, O'connor P, Polman CH, Haas T, Korn AA, Karlsson G, Radue EW (2006) Oral fingolimod (FTY720) for relapsing multiple sclerosis. *N Engl J Med* 355: 1124-1140.
24. Gorelik L, Lerner M, Bixler S, Crossman M, Schlain B, Simon K, Pace A, Cheung A, Chen LL, Berman M, Zein F, Wilson E, Yednock T, Sandrock A, Goelz SE, Subramanyam M (2010) Anti-JC virus antibodies: implications for PML risk stratification. *Ann Neurol* 68: 295-303. 10.1002/ana.22128 [doi].

- 1  
2  
3 25. Lorvik KB, Bogen B, Corthay A (2012) Fingolimod blocks immunosurveillance of  
4 myeloma and B-cell lymphoma resulting in cancer development in mice. *Blood* 119: 2176-  
5 2177. 119/9/2176 [pii];10.1182/blood-2011-10-388892 [doi].  
6  
7 26. Berg-Hansen P, Moen S, Harbo H, Celius E. High prevalence and no latitude gradient of  
8 multiple sclerosis in Norway. *Mult Scler* 2014.  
9  
10 27. Heesen C, Solari A, Giordano A, Kasper J, Köpke S. Decisions on multiple sclerosis  
11 immunotherapy: New treatment complexities urge patient engagement. *J Neurol Sci* 2011;  
12 306: 192-7.  
13  
14 28. Heesen C, Köpke S, Solari A, Geiger F, Kasper J. Patient autonomy in multiple sclerosis -  
15 possible goals and assessment strategies. *J Neurol Sci* (2013),  
16 <http://dx.doi.org/10.1016/j.jns.2013.02.018>  
17  
18 29. Fosli Jensen B, Gulbrandsen P, Dahl FA, Krupat E, Frankel RM, Finset A. Effectiveness  
19 of a short course in clinical communication skills for hospital physicians: results of a  
20 crossover randomized controlled trial (ISRCTN22153332). *Patient Educ Couns* 2011; 84;  
21 163-9.  
22  
23 30. Rao JK, Anderson LA, Inui TS, Frankel RM. Communication interventions make a  
24 difference in conversations between physicians and patients. A systematic review of the  
25 evidence. *Med Care* 2007; 45: 340-9.  
26  
27 31. Weiss MC, Peters TJ. Measuring shared decision making in the consultation: a  
28 comparison of the OPTION and Informed Decision Making instruments. *Patient Educ Couns*  
29 2008; 70: 79-86.  
30  
31 32. Kasper J, Hoffmann F, Heesen C, Köpke S, Geiger F. MAPPIN'SDM - The Multifocal  
32 Approach to Sharing in Shared Decision Making. *PLoS ONE* 2012; 7(4): e34849.  
33 doi:10.1371/journal.pone.0034849.  
34  
35 33. Crabtree BF, Miller WL, eds. *Doing qualitative research*. 2nd ed. Thousand Oaks, CA:  
36 Sage Publications, 1999.  
37  
38 34. Krupat E, Frankel R, Stein T, Irish J. The Four Habits Coding Scheme: validation of an  
39 instrument to assess clinicians' communication behaviour. *Patient Educ Couns* 2006; 62: 38-  
40 45.  
41  
42 35. Watson D, Clark LA, Tellegen A. Development and validation of a brief measures of  
43 positive and negative affect: The PANAS scales. *J Pers Soc Psychol* 1988; 54: 1063-70.  
44  
45 36. Hall JA, Stein TS, Roter DL, et al. Inaccuracies in physicians' perceptions of their  
46 patients. *Med Care* 1999; 37: 1164-8.  
47  
48 37. Gulbrandsen P, Benth JS, Dahl FA, Jensen BF, Finset A, Hall JA. Specialist physicians'  
49 sensitivity to patient affect and satisfaction. *Med Care* 2012; 50: 290-3.  
50  
51 38. Elwyn G, Hutchings H, Edwards A, Rapport F, Wensing M, Cheung WY, Grol R. The  
52 OPTION scale: measuring the extent that clinicians involve patients in decision-making tasks.  
53 *Health Expect* 2005; 8: 34-42.  
54  
55  
56  
57  
58  
59  
60

1  
2  
3  
4  
5  
6  
7 There is no named PhD candidate so this file is empty.

8  
9 We will primarily recruit a resident neurologist as PhD candidate, alternatively a resident in  
10 another  
11  
12 specialty.  
13  
14  
15  
16  
17  
18  
19  
20  
21  
22  
23  
24  
25  
26  
27  
28  
29  
30  
31  
32  
33  
34  
35  
36  
37  
38  
39  
40  
41  
42  
43  
44  
45  
46  
47  
48  
49  
50  
51  
52  
53  
54  
55  
56  
57  
58  
59  
60

For peer review only

# Study record 32248

Generated: 23/06/2016 9:08:05

Editorial Status: Submitted

## Title and Additional Identifiers

### Submission number

32248

### ISRCTN

### DOI

### Public title

Improved involvement of multiple sclerosis patients in discussions about treatment

### Scientific title

Enabling shared decision-making about treatment with multiple sclerosis patients: A preclinical intervention study

### Acronym

### EudraCT number

### ClinicalTrials.gov number

### Protocol /serial number

2015/FO7408

### Condition category

### Date Applied

23/06/2016

### Date Assigned

### Last Edited

23/06/2016

### Prospective/Retrospective

### Overall Trial Status

Ongoing

### Recruitment Status

No longer recruiting

## Study Information

## Study hypothesis

A 3 hour course in how to provide information will improve MS patients' ability to recall information given by doctors.

## Ethics approval

The Regional Committee for Medical and Health Research Ethics (Southeast Norway). Reference # 2015/161. The committee decided that as this experiment is not medical or health research and therefore exempted from review. Date: March 24, 2015.

## Study design

This is a preclinical interventional study. MS patients are invited to meet a doctor in a fictitious situation in which they need to discuss a change in treatment with several options (that is; this is not an actual need for this patient, but something that may happen in the future). The doctors meet one patient before and one after they have received a 3 hour course in how to give information. Patients are randomly allocated to meet a doctor before or after the intervention. The randomization is performed by an independent statistician. More patients than needed are invited and randomized, so that if a patient cannot meet, another patient from the same arm of the study can substitute. The patients will not know if they meet a doctor before or after the intervention. This is a single-centre study. Patients are identified in the hospital patient records, and initially contacted by telephone for recruitment.

## Primary study design

Interventional

## Secondary study design

Randomised controlled trial

## Trial setting

Hospitals

## Trial type

Other

## Overall trial start date

01/04/2014

## Overall trial end date

31/12/2016

## Overall trial status override

## Reason abandoned

## Condition

Multiple sclerosis. The study object, however, is information provision as part of patient involvement. Results may have value for other patient groups.

## Interventions

Patients are not "treated", but exposed to doctors with or without recent training in information provision. The training is a 3 hours course given in small groups of doctors. The content of the

1 course is simple instruction in important aspects of information giving. All course participants  
2 will need to practice the instruction in role-plays. As mentioned earlier, the participating patients  
3 are allocated to meet a doctor before or after the doctor has been trained. One researcher  
4 observes the doctor-patient interaction and notes all information that is provided. The  
5 researcher interviews the patient directly after, first using open questions to elicit understanding  
6 and recall, followed by prompted, but not leading questions about information the doctor  
7 provided to elicit as accurate recall as possible. Both doctor-patient interaction and post-visit  
8 interview are videotaped, and independent coders that will not know if the interaction is pre or  
9 post intervention identify and decide whether patient recall of each information the doctor has  
10 given is sufficiently precise to represent the information given. Following these procedures we  
11 will be able to calculate the percentage of given information that is recalled, and whether there  
12 is a significant difference between patients in the pre-course and post-course arms of the study.  
13 In addition, we will use a battery of questionnaires (MAPPIN'SDM, Collaborate, Four Habits  
14 Patient Questionnaire) to map the patients' evaluation of communication, information provision,  
15 and involvement in decision-making.  
16  
17

## 18 **Intervention Type**

19 Behavioural

## 20 **Phase**

## 21 **Drug name(s)**

## 22 **Primary outcome measures**

23 The amount of information provided by the doctors that is recalled by the patients.  
24  
25

## 26 **Secondary outcome measures**

27 Secondary outcomes (questionnaires) will be measured immediately after the visit. We also aim  
28 to collect an outcome defined during video observations, how strongly the doctors adhere to the  
29 principles of information provision. This will need more time, as one will have to calculate  
30 inter-rater reliability of the coders etc. So both the primary outcome measure and this secondary  
31 outcome measure is likely to be finalized several months after the data collection is finished.  
32  
33  
34  
35  
36  
37

## 38 **Trial website**

## 39 **Participant information sheet**

40 The PIS is in Norwegian and available by contacting the principal investigator: pal.gulbrandsen@  
41 medisn.uio.no  
42  
43  
44

## 45 **Eligibility**

### 46 **Participant inclusion criteria**

47 Patients with relapsing remitting MS who currently use a first line drug and who have not  
48 previously been exposed to the decision to begin with a second line drug.  
49  
50  
51

### 52 **Participant type**

53 Patient

### 54 **Age group**

55 Adult  
56  
57  
58  
59  
60

**Gender**

Both

**Target number of participants**

32 is necessary for the trial, but we aim to recruit an additional 10 as substitutes.

**Participant exclusion criteria**

We have no exclusion criteria.

**Recruitment start date**

01/05/2016

**Recruitment end date**

31/05/2016

**Recruitment status override****Locations****Countries of recruitment**

Norway

**Trial participating centres****Trial Centre****Trial Centre Name**

Akershus University Hospital

**Address**

Post office box 1000

**City**

Lørenskog

**Country**

Norway

**Zip**

1478

**Plain English Summary**

Patient involvement in decision-making requires information provision during medical encounters. Several studies indicate that doctors' information provision often is insufficiently structured, imprecise, characterized by use of jargon, and not adjusted to the patient's needs. This study aims to try out whether a rather simple training session for doctors leads to an improvement in these respects, in a way that helps patients to better recall the information they

received.

Patients with multiple sclerosis often face difficult decisions about choice of treatment. The reasons for this are several: the natural course of the disease is unpredictable but potentially serious, there are several new drugs available with different effects, side effects, and risks, and because of the drugs' novelty long-term effects are not well-known, while the disease itself is life-long usually spanning decades. It is hard, even for a doctor, to keep track of all the information available, and even experts will admit uncertainty about choice of treatment. Patient involvement in these situations is a difficult task. We have decided to focus on the actual quality of information provision, with an underlying hypothesis that if this part functions better, patient involvement will improve as well.

We have decided to design a small preclinical trial in which we hope to identify a large effect of training. The rationale for this is that we think it will be difficult later, on a large scale, to convince busy neurologists that they should go through training if the effect is small. Using this line of thinking, in this study we only need 16 neurologists, meeting two patients each, one before and one after training. Hence, 32 patients will be recruited. Whether they will meet a trained or an untrained doctor is random.

All doctor-patient interactions will be videotaped and post-visit interviews as well. We will calculate how much of the information the doctor provided that the patients remember. We will also ask the patients about the quality of the consultation, in terms of communication, information, and involvement. In addition, we will measure how well the doctors adhere to the training principles.

The training session has been piloted in a different hospital, with gastroenterologists, giving information at discharge from hospital. In this pilot study, data collection has been less rigorous and not included videos. Results using evaluations by doctors and patients are promising.

Our overall aim is that we can find ways to help doctors become better information providers, using condensed training sessions, as one part of the important changes in society regarding patient participation in decisions about treatment.

## Results and Publications

### Publication and dissemination plan

We plan to publish several papers in scientific journals:

- a) the effect of the training on patient recall
- b) the effect of the training on patient evaluation of communication, information, and involvement
- c) the effect of the training on doctor adherence to principles of information provision
- d) several other papers using qualitative methods, not about effects of the trial, but rather about how training affects the interaction in other ways.

### Intention to publish date

01/02/2018

### Participant level data

To be made available at a later date

### Results - basic reporting



**Results – Plain English Summary****Publication summary****Publication citation(s)****Contact(s)****Contact****Type**

Scientific

**Title**

Prof

**Name**

Pål Gulbrandsen

**ORCID ID****Address**

HØKH Research Centre, Akershus University Hospital, PO BOX 1000

**City**

Lørenskog

**Country**

Norway

**Zip**

1475

**Tel**

95827288

**Email**

pal.gulbrandsen@medisin.uio.no

**Privacy**

Public

**Sponsor(s)****Sponsor**

**Organisation**

Akershus University Hospital

**Address**

PO BOX 1000

**City**

Lørenskog

**Country**

Norway

**Zip**

1475

**Tel**

+4702900

**Email**

hilde.luras@ahus.no

**Type**

Hospital/treatment centre

**Website****Privacy**

Protected

**Funder(s)****Funding Type**

Not defined

**Funder****Funder Name**

EkstraStiftelsen Helse og Rehabilitering

**Alternative Name(s)**

Norwegian Foundation for Health and Rehabilitation ExtraStiftelsen

**Funding Body Type**

Private sector organisation

**Funding Body Subtype**

Foundation

**Location**

1 Norway

2

## 3 Applicant Details

4

5

### 6 Name

7 Pål Gulbrandsen

8

9

### 10 ORCID ID

11

### 12 Address

13

### 14 City

15

### 16 Country

17

### 18 Zip

19

### 20 Tel

21

### 22 Email

23 pal.gulbrandsen@medisin.uio.no

24

25

26

## 27 Payment Method

28

29

### 30 Payment method

31 Online payment

32

33

### 34 Trusted funder

35

## 36 Invoice Details

37

38

### 39 Name

40

### 41 Institution

42

### 43 Address

44

### 45 City

46

### 47 State

48

### 49 Country

50

### 51 Zip

52

### 53 Email

54

### 55 Purchase order/ reference number

56

### 57 VAT number

58

59

60

1  
2 **Why did you choose ISRCTN to register your trial?**

3  
4 Previously registered a trial  
5  
6  
7  
8  
9  
10  
11  
12  
13  
14  
15  
16  
17  
18  
19  
20  
21  
22  
23  
24  
25  
26  
27  
28  
29  
30  
31  
32  
33  
34  
35  
36  
37  
38  
39  
40  
41  
42  
43  
44  
45  
46  
47  
48  
49  
50  
51  
52  
53  
54  
55  
56  
57  
58  
59  
60

For peer review only

# BMJ Open

## Training physicians in providing complex information to patients with multiple sclerosis; A randomised controlled trial

|                                 |                                                                                                                                                                                                                                                                                                                                                                                                                                                                                                                                                                                                                                                    |
|---------------------------------|----------------------------------------------------------------------------------------------------------------------------------------------------------------------------------------------------------------------------------------------------------------------------------------------------------------------------------------------------------------------------------------------------------------------------------------------------------------------------------------------------------------------------------------------------------------------------------------------------------------------------------------------------|
| Journal:                        | <i>BMJ Open</i>                                                                                                                                                                                                                                                                                                                                                                                                                                                                                                                                                                                                                                    |
| Manuscript ID                   | bmjopen-2021-049817.R1                                                                                                                                                                                                                                                                                                                                                                                                                                                                                                                                                                                                                             |
| Article Type:                   | Original research                                                                                                                                                                                                                                                                                                                                                                                                                                                                                                                                                                                                                                  |
| Date Submitted by the Author:   | 07-Dec-2021                                                                                                                                                                                                                                                                                                                                                                                                                                                                                                                                                                                                                                        |
| Complete List of Authors:       | Nordfalk, Jenny; Akershus University Hospital, Department of Neurology; University of Oslo Faculty of Medicine, Institute of Clinical Medicine<br>Holmøy, Trygve; Akershus University Hospital Neuroclinic, Department of Neurology; University of Oslo Faculty of Medicine, Institute of Clinical Medicine<br>Thomas, O.; Akershus University Hospital, Health Services Research Unit HØKH<br>Nylenna, Magne; Norwegian Institute of Public Health, Institute of Health and Society<br>Gulbrandsen, Pal; University of Oslo Faculty of Medicine, Institute of Clinical Medicine; Akershus University Hospital, Health Services Research Unit HØKH |
| <b>Primary Subject Heading</b>: | Medical education and training                                                                                                                                                                                                                                                                                                                                                                                                                                                                                                                                                                                                                     |
| Secondary Subject Heading:      | Neurology, Health services research, Cardiovascular medicine                                                                                                                                                                                                                                                                                                                                                                                                                                                                                                                                                                                       |
| Keywords:                       | Multiple sclerosis < NEUROLOGY, MEDICAL EDUCATION & TRAINING, Quality in health care < HEALTH SERVICES ADMINISTRATION & MANAGEMENT, EDUCATION & TRAINING (see Medical Education & Training)                                                                                                                                                                                                                                                                                                                                                                                                                                                        |
|                                 |                                                                                                                                                                                                                                                                                                                                                                                                                                                                                                                                                                                                                                                    |

SCHOLARONE™  
Manuscripts



I, the Submitting Author has the right to grant and does grant on behalf of all authors of the Work (as defined in the below author licence), an exclusive licence and/or a non-exclusive licence for contributions from authors who are: i) UK Crown employees; ii) where BMJ has agreed a CC-BY licence shall apply, and/or iii) in accordance with the terms applicable for US Federal Government officers or employees acting as part of their official duties; on a worldwide, perpetual, irrevocable, royalty-free basis to BMJ Publishing Group Ltd ("BMJ") its licensees and where the relevant Journal is co-owned by BMJ to the co-owners of the Journal, to publish the Work in this journal and any other BMJ products and to exploit all rights, as set out in our [licence](#).

The Submitting Author accepts and understands that any supply made under these terms is made by BMJ to the Submitting Author unless you are acting as an employee on behalf of your employer or a postgraduate student of an affiliated institution which is paying any applicable article publishing charge ("APC") for Open Access articles. Where the Submitting Author wishes to make the Work available on an Open Access basis (and intends to pay the relevant APC), the terms of reuse of such Open Access shall be governed by a Creative Commons licence – details of these licences and which [Creative Commons](#) licence will apply to this Work are set out in our licence referred to above.

Other than as permitted in any relevant BMJ Author's Self Archiving Policies, I confirm this Work has not been accepted for publication elsewhere, is not being considered for publication elsewhere and does not duplicate material already published. I confirm all authors consent to publication of this Work and authorise the granting of this licence.

# Training physicians in providing complex information to patients with multiple sclerosis; A randomised controlled trial.

Nordfalk J.M.<sup>1</sup>, Holmøy T.<sup>2</sup>, Thomas O.<sup>3</sup>, Nylenna M.<sup>4</sup>, Gulbrandsen P.<sup>5</sup>

<sup>1</sup> Jenny M. Nordfalk, Department of Neurology, Akershus University Hospital, Lørenskog; Institute of Clinical Medicine, University of Oslo, Norway.

<sup>2</sup> Trygve Holmøy, Department of Neurology, Akershus University Hospital, Lørenskog; Institute of Clinical Medicine, University of Oslo, Norway.

<sup>3</sup> Owen Thomas, Health Services Research Unit HØKH, Akershus University Hospital, Lørenskog, Norway.

<sup>4</sup> Magne Nylenna, Institute of Health and Society, University of Oslo; Norwegian Institute of Public Health, Oslo, Norway.

<sup>5</sup> Pål Gulbrandsen, Institute of Clinical Medicine, University of Oslo; Health Services Research Unit HØKH, Akershus University Hospital, Lørenskog, Norway.

Corresponding author at: Jenny M. Nordfalk, Health Services Research Unit HØKH, Akershus University Hospital, Mail drawer 1000, 1478 Lørenskog, Norway, nordfalk@yahoo.no

Word count: 3776

Keywords: Multiple Sclerosis, patient information, communication, randomised controlled trial

**ABSTRACT**

**Objective:** To evaluate the effect of a specific communication training for neurologists on how to provide complex information about treatment options to multiple sclerosis (MS) patients.

**Design:** Single-centre, single-blind, randomised controlled trial.

**Setting:** One university hospital in Norway.

**Participants:** Thirty-four early-stage Multiple Sclerosis (MS) patients.

**Intervention:** A three-hour training for neurologists on how to provide complex information about MS escalation therapy.

**Main outcome measures:** Patient recall rate, measured with a reliable counting system of provided and recalled information about drugs.

**Secondary outcome measures:** Number of information units provided by the physicians. Effects on patient involvement through questionnaires.

**Methods:** The MS patients were instructed to imagine a disease development, and were randomized and blinded to meet a physician to receive information on escalation therapy, before or after the physician had participated in a three-hour training on how to provide complex information. Consultations and immediate patient recall interviews were video-recorded and transcribed verbatim.

**Results:** Patient recall rate was 0.37 (SD=0.10) pre-intervention and 0.39 (SD=0.10) post-intervention. The effect of the intervention on recall rate predicted with a general linear model (GLM) covariate was not significant (coefficient parameter 0.07 (SE 0.04, 95% confidence interval (CI) [-0.01; 0.15]),  $p=0.099$ ).

The physicians tended to provide significantly fewer information units after the training, with an average of 91.0 (SD=30.3) pre-intervention and 76.5 (SD=17.4) post-intervention; coefficient parameter -0.09 (SE 0.02, 95% CI [-0.13; -0.05]),  $p<0.001$ . There was a significant negative association between the amount of provided information and the recall rate (coefficient parameter -0.29 (SE 0.05, 95% CI [-0.39; -0.18]),  $p<0.001$ ). We found no significant effects on patient involvement using the Control Preference Scale, Collaborate, or Four Habits Patient Questionnaire.

**Conclusion:** A brief course for physicians on providing complex information reduced the amount of information provided, but did not improve patient recall rate.

**Trial registration:** ISRCTN 42739508

**Strengths and limitations of this study:**

- RCT design, adapted to health communication research
- Multiple sclerosis patients with unique insight in the disease, and emotional connection to the information
- Reliable measurement of recall of complex information given in free speech
- A small sample



## INTRODUCTION

Multiple sclerosis (MS) immunomodulatory treatment has become increasingly complex as new drugs have been introduced, differing in efficacy, risk/adverse effect profile and administration form.<sup>1 2</sup> In Norway, guidelines for MS treatment issued by the Norwegian Directorate of Health state which disease-modifying therapies (DMT) should be introduced initially, and which should be introduced as escalation therapy when relapse occurs<sup>1</sup> or if the patient initially presents with a very active disease.<sup>2</sup>

Informing MS patients about escalation therapy alternatives involves comprehensive exchange of situation-specific information, including risks and effects subject to uncertainty. This information is usually delivered by a neurologist in a task-based but unscripted dialogue with a patient who is experiencing an emotionally charged situation.<sup>3 4</sup>

Medical information should ideally be provided in a way that enables patient autonomy and involvement in treatment decisions.<sup>5</sup> Patients desire tailored information.<sup>6-8</sup> The quality of communication is therefore crucial, if not clearly proven to influence the patients' ability to manage their disease,<sup>6 7 9</sup> at least to improve patient adherence.<sup>10</sup>

Several studies have shown that recall of medical information is suboptimal.<sup>11-16</sup> Cognitive impairments associated with MS make information processing more difficult.<sup>17-19</sup> Even in early-stage MS, subtle memory disturbance has been shown to be common.<sup>20 21</sup> Improvement of information recall among MS patients is necessary to avoid lack of patient involvement, adherence, and poor outcomes.

A few studies have investigated patient uptake of complex information as an outcome measure; most have directed interventions at patients.<sup>22 23</sup> Intervention studies that link communication training of physicians to patient outcomes in general are rare,<sup>24 25</sup> and to patient recall even more so. The question has been raised whether recall in complex chronic illness management could be improved by changing the communication behaviour of health care personnel.<sup>23</sup> Various oral communication strategies have been examined and found to improve patient recall in various ways; like repetition,<sup>26 27</sup> simplification of language, pauses, personal relevance,<sup>27-29</sup> and structuring.<sup>27 30</sup> One recent study has shown recall rate improvement by information structuring and categorization, but only for disadvantaged subgroups of a population.<sup>31</sup> Other studies have not showed such an effect, and the phenomena remain understudied in clinical populations.<sup>32</sup> Lehmann et al. did show that providers should tailor both portioning and amount of information to patient preferences, as those wanting more, also recalled more information.<sup>33</sup>

However, the interventions investigated have usually been long, and most often involved video-vignettes studies or analogue patients, i.e., healthy subjects pretending to be patients. Studies have usually tested single, generic strategies, not a set of strategies selected and tailored to the needs of a specific group of professionals and rarely performed in unscripted conversations with real patients. Hence, ecological validity remains unclear. Furthermore, increasing demand on cost control in healthcare makes long training interventions for physicians less attractive to administrators.

In order to accommodate these shortcomings, this study tested a very brief communication training intervention, performed in natural conversations with real patients, albeit in a fictitious setting, with a set of information provision strategies selected to tailor the needs of physicians working with MS patients. We tested whether a brief intervention focused on how to deliver complex information, tailored to a selected population of *physicians*, improved *patient* recall rate.

## METHODS

### Study design

This was a single-centre, single blind randomised controlled pilot trial to determine the effect of brief communication skills training for physicians on patient recall of information provided by the physician. Patients with early-stage MS were randomised to be exposed to a physician either before or after training, see an overview of the study design visualized in figure 1.

### Fig. 1 Study Design Overview. Result: Patient recall rate.

<PLEASE INSERT FIGURE 1 HERE>

### Participants and setting

#### Patients

The ability to recall information provided depends on its relevance, degree of patient involvement and the emotional state of the recipient.<sup>16 29 34-36</sup> When designing this experiment, we therefore wanted to recruit real MS patients, who know how it is to live under the sword of Damocles, that is, any time and day symptoms of exacerbations of the disease may appear.<sup>37</sup> To set up an experiment in a communication lab, however, we could not rely on the unpredictable influx of patients in need of escalation therapy. Hence, we approached outpatients identified in the electronic patient records at Akershus University Hospital (Ahus), a teaching hospital in the capital region of Norway with a population uptake area of 575,000 inhabitants.<sup>38</sup> The patients had to meet the following eligibility criteria to be asked for participation and included:

- (a) being 18 years old or above;
- (b) diagnosed with relapsing remitting MS (RR-MS) between 2009 and 2012;
- (b) currently on no or first-line treatment;
- (c) not yet exposed to a decision about choice of escalation treatment;
- (d) not yet received thorough information about escalation treatment options and their pros and cons by a neurologist.

Eligible patients were asked if they were willing to imagine themselves having experienced exacerbations, and meet a physician to discuss further treatment. If willing, they were included in the study.

125 Physicians

126 We presented the planned study for the physicians working in the Neurology Department at Ahus on staff meeting and through  
127 email. Participating physicians were required to regularly meet MS patients in their work. To compensate for differences in their  
128 level of experience, participants were provided with an overview of information including risk-benefit stratification for the three  
129 most relevant escalation medications commonly used in Norway in 2016; natalizumab, alemtuzumab, and fingolimod<sup>39-41</sup>.

131 Setting

132 Consultations and post-consultation recall interviews with patients were video recorded in a communication lab facility on  
133 hospital grounds. The patients were instructed beforehand to imagine that they had recently experienced two unspecific, function-  
134 reducing attacks and had undergone an MRI-scan and blood tests. They were now to consult with a physician about the tests and  
135 scan results, receive information about escalation treatment and discuss options. Except for this fictitious setting, the patients were  
136 instructed to use their personal history and behave as themselves. The physicians were fully informed about the fictitious setting.  
137 They received information in advance on which and how few details the patients had been given, and were asked not to go into  
138 details about previous or recent clinical findings or attacks, nor to examine the patient. They also received an exacerbation history,  
139 results of a recent MRI-scan showing new lesions and a JCV antibody index of 0.8.<sup>42-45</sup>, all framed as a journal exempt.  
140 Physicians were given approximately 20 minutes for the consultation, to mirror the usual timing of a busy scheduled day. They  
141 were instructed to handle the situation as they would have done in their everyday work, basing the discussion of treatment  
142 escalation on the individual situation and risk profile of the patient.<sup>2 39</sup>

145 **Intervention**

146 The intervention was a 3-hour communication training course, specifically focused on structured and patient-centered information  
147 provision, and targeted at physicians working in neurology. The course was developed and held by a professor specialized in  
148 health communication research with extensive experience in teaching medical students and physicians communication skills (PG).  
149 It was a condensed version of patient-centered communication skills training<sup>46</sup> with an emphasis on strategies which have been  
150 tested or have been expected to improve recall and understanding (creating a safe environment, exploring the patient's  
151 understanding and perspectives, prioritizing and adapting the amount of information to the patient's prior understanding and  
152 needs, using signposting, short sentences, pauses, explanations without jargon, and checking for understanding).<sup>26 27 31 47-49</sup> The 3-  
153 hour course comprised a 50/50 mix of theoretical instruction and practical training with role plays. Whereas strategies discussed  
154 are not specific for communication with MS patients, examples and practice cases aimed to illustrate treatment decision-making in  
155 MS were used. The course was provided in three sessions, for 5-6 physicians at a time, September 21-27, 2016.

## Study procedures

A researcher not involved in the development and delivery of the training (JN) observed the consultation on-screen in an adjacent room while taking notes with the help of an observational sheet. Immediately after the physician had left the room, JN performed the recall interview with the patient while the recording proceeded uninterrupted (Fig. 2). The recall interview guide was strict, with initial open questions, followed by a tailored part in which JN anchored the questions specifically to the information the doctor had provided during the visit, based on the notes collected during the observation of the specific consultation. Each physician saw two patients, one before and one after attending the communication training. Pre-intervention consultations took place August 16-September 15, 2016, post-intervention consultations took place October 3-November 3, 2016.

## Fig. 2. Data Collection Procedure

<PLEASE INSERT FIGURE 2 HERE>

## Outcomes

### Primary outcome measure

The *from protocol* primary outcome measure was the patient recall rate measured as the amount of information recalled by the patient divided by the amount of information given by the doctor, based on transcripts of the videos. We limited the measurement to information concerning the three most relevant drug alternatives when initiating second-line MS-treatment.<sup>40</sup> We developed a specific system for measuring complex oral information transfer in medical consultations, counting the number of information units provided by the physician, and the proportion of these units recalled by the patients.<sup>50</sup> This measure contains a sophisticated system of definitions that enables a coder to break down complex conversation into the smallest countable units that carry meaningful medical information. One quite simple example would be the statement «One option is Tysabri, which you get in the hospital as a monthly infusion. » Here, the smallest possible units of information are:

- One option is Tysabri [a] – *name of medication 1p*
- In the hospital [b] – *administration place 1p*
- infusion [c] – *administration manner 1p*
- monthly [d] – *administration frequency 1p*

The system involved three researchers (JN, MN, PG) and demonstrated high inter-rater reliability (IRR)<sup>50</sup>. After establishment of the IRR, JN coded all transcripts for this study.

### Secondary outcome measures

190 The *from protocol* secondary outcome measure was the effect of the intervention on the mean amount of oral information  
191 provided by the physicians. We also explored possible effects on patient involvement using the Control Preference Scale  
192 (patient),<sup>51</sup> Collaborate,<sup>52 53</sup> and the Four Habits Patient Questionnaire,<sup>54 55</sup> all of these after the consultation.

### 195 **Sample size estimation**

196 The study was designed as a preclinical trial. No previous ways of measuring orally provided information were available, so the  
197 numerical effect size of the measure we developed,<sup>50</sup> as well as its natural variability, was unknown. For a high effect size, we  
198 decided to consider the standard deviation of the measured effect as proxy of the average effect of the intervention. Under  
199 standard assumptions of a two-sided t-test of statistical significance at 5% and 80% power, 16 patients in each arm of the study  
200 were necessary.

### 203 **Randomization**

204 An independent statistician performed the randomization of patients agreeing to participate. The R-method sample (1-42, 21) was  
205 used to draw a random subsample of size 21 from the set of 42 patients. (Fig. 3) The four last patients on each list were given  
206 substitute status. The random sample was generated without any blocking or stratification restrictions beyond its size. JN enrolled  
207 participants and assigned them blinded to either the control or the intervention group.

### 210 **Statistical methods**

211 We investigated the effect of the intervention on the recall rate, alongside various secondary outcomes. This was done with  
212 separate generalized linear mixed models, using the doctor ID as a random effect and the variables of interest as dependent  
213 variables and fixed effects. Likelihood functions were chosen appropriately for the distribution of the dependent variable.  
214 Standard maximum likelihood estimates (MLE) inference was pursued, giving corresponding confidence intervals and p-values.

### 216 **Ethics, privacy regulations, and pre-trial registration**

217 The trial was registered in ISRCTN ([www.isrctn.com](http://www.isrctn.com)) June 23, 2016, reg.: ISRCTN42739508.

218 The study was considered by The Regional Committee of Southeast Norway for Medical and Health Research Ethics. Reference #  
219 2015/161. The committee decided that as this experiment was not covered by their definitions of medical or health research it was  
220 exempted from review. Participants received no compensation for their participation.

### 222 **Patient and Public Involvement**

For peer review only - <http://bmjopen.bmj.com/site/about/guidelines.xhtml>

An MS patient representative and a professor of medical ethics constituted an advisory group for the project.

## RESULTS

### Participants

All participants, patients and physicians, were included between April 12, 2016 and May 2, 2016. Among approximately 60 resident or consultant physicians employed at the Department of Neurology at Akershus University Hospital, 17 agreed to participate. All provided informed consent. Ten were male (59%), median age was 39 (range 29-57). They had between 2 and 29 years of work experience (median=11) (Table 1).

Table 1. Participant characteristics; Neurologists and patients.

|                              | Neurologists |     | Patients |     |                 |                      |    |
|------------------------------|--------------|-----|----------|-----|-----------------|----------------------|----|
|                              | (n)          | (%) | (n)      | (%) | Control arm (n) | Intervention arm (n) |    |
| All                          | 17           | 100 | All      | 34  | 100             | 17                   | 17 |
| Female                       | 7            | 41  | Female   | 25  | 74              | 12                   | 13 |
| Male                         | 10           | 59  | Male     | 9   | 26              | 5                    | 4  |
| Age by first consultation    |              |     | Age      |     |                 |                      |    |
| <36                          | 3            | 18  | 21-30    | 3   | 9               | 1                    | 2  |
| 36-45                        | 10           | 59  | 31-40    | 6   | 18              | 2                    | 4  |
| >45                          | 4            | 24  | 41-50    | 16  | 47              | 10                   | 5  |
| Years of clinical experience |              |     | 51-60    | 7   | 21              | 3                    | 4  |
| <5                           | 4            | 24  | 61-70    | 2   | 6               | 0                    | 2  |
| 6-10                         | 3            | 18  |          |     |                 |                      |    |
| 11-15                        | 6            | 35  |          |     |                 |                      |    |
| >15                          | 4            | 24  |          |     |                 |                      |    |

236  
1  
237  
3  
238 Patient recruitment is shown in figure 3. Out of the 53 eligible MS patients we reached, 42 agreed to participate and provided  
5  
239 informed consent (79%). They were randomised into two groups, each with 17 participants and 4 substitutes. 34 finally  
7  
240 participated in the study. Median age was 48 (range 21-66 years old). Twenty-five were female (Table 1).

241 An overview of the participant flow is shown in figure 3. Three patients opted out after the study had begun, but before partaking,  
11  
242 and was replaced by substitutes already randomised to the same arm.

243  
244 **Fig. 3 CONSORT 2010 Participant Flow.**

245 <PLEASE INSERT FIGURE 3 HERE>

246  
247 Both pre- and post-intervention consultations lasted on average 21 minutes (range 8-29 minutes, median 20 minutes). From the  
22  
248 consultation transcripts, 1652 physician statements containing information about the three predefined drug alternatives were  
24  
249 identified.

250  
251  
252  
253 **Primary and secondary outcomes**

254 The recall rate was 0.37 in the pre-intervention group and 0.39 in the post-intervention group. When predicting the recall rate with  
34  
255 the intervention using a binomial likelihood, we found the general linear model (GLM) covariate coefficient parameter 0.07 (SE  
36  
256 0.04, 95% confidence interval (CI) [-0.01; 0.15]),  $p=0.099$ .

257  
258 The average number of oral information units provided by the physicians before and after the intervention were 91.0 and 76.5,  
42  
259 respectively. When predicting this *a priori* secondary outcome with the intervention using a Poisson likelihood, we found the  
44  
260 coefficient parameter -0.09 (SE 0.02, 95% CI [-0.13; -0.05]),  $p<0.001$ . When predicting the recall rate with the amount of  
46  
261 information provided, we found the coefficient parameter -0.29 (SE 0.05, 95% CI [-0.39; -0.18]),  $p<0.001$ .

262  
263 We found no significant effects of the intervention on patient involvement using the Control Preference Scale, Collaborate, or  
51  
264 Four Habits Patient Questionnaire. We also did not find effects of the patient's gender or age on recall rate.

265  
266  
267 **DISCUSSION**



269 We embarked on this study knowing that hospitals are reluctant to spend resources on extensive courses if strong effects are not  
1 demonstrated, and hoping that focus on a simple set of instructions could render a physician behavioural change strong enough to  
270 3 have a detectable effect on patient recall in a small pilot study. We did this, even though two systematic reviews on the effect of  
271 5 general communication skills courses suggested that brief interventions consistently yielded small effects.<sup>22 56</sup> However, some  
272 7 papers suggested that courses of five hours or less could have effect.<sup>57-60</sup> These studies addressed emotional communication,  
273 9 patient participation effect,<sup>57 58 60</sup> or a very simple instruction about *one* medication,<sup>59</sup> and did not introduce patient adjusted  
274 11 information provision. Neither did they measure effect of the intervention by actual measurement of patient recall. Our study  
275 13 encompassed tailored information giving in a free dialogue with a real patient. Tailored information provision is a complex task,  
276 15 particularly so in the case of involving real patients in decision making about second-line treatment for MS, which requires that  
277 17 they be well informed about pros and cons of options. The information given in our data set was a lot more complex than in the  
278 19 studies referenced above. Our study suggests that complex information giving tasks require more extensive training than a 3-h  
279 21 course to achieve substantial changes in patient recall, at least in decisions as difficult as choice of MS treatment.  
280 23

281 25  
282 27 In accordance with the principle of prioritizing information tailored to the patient,<sup>33</sup> which was one of the strategies taught to  
283 29 physicians in our training, we observed a significant decrease in the amount of information provided by physicians (secondary  
284 31 outcome) after having received the training. We also found that the recall rate decreased with increased amount of information  
285 33 provided, which is in line with previous findings.<sup>34 61</sup>

286 35 Questionnaires did not document changes in patient involvement. We did not expect to find changes in such proxy measures in a  
287 37 small pilot, particularly as the intervention was directed foremost to improve information provision, not patient involvement.  
288 39 However, in case we had found changes in patient involvement, we could have explored associations between observed physician  
289 41 behaviour (not reported in this paper), and involvement.  
290 43

291 45 The strengths of this study, besides the RCT design, are several. Real MS patients could easily envision the fictitious position they  
292 47 were in during the consultation, so that information was highly relevant and with potential to evoke emotions. The physicians  
293 49 were not instructed to provide a prefixed set of information, but rather inform the patients according to what happened in the  
294 51 encounter, closely resembling real clinical situations. The recall interview used a technique with questions specifically anchored  
295 53 to the information that had been given, thus providing memory cues without “helping” the patient. The effect measure was direct  
296 55 recall as fraction of information provided, not more commonly used proxy measurements using questionnaires.  
297 57

298 59 Patients were blinded to training status of the physicians. Furthermore, more female than male patients participated (ratio 2.8), in  
299 61 accordance with population-based epidemiological data and data from the Norwegian MS Registry, in which the female to male  
ratio ranged from 1.7 to 2.7,<sup>62</sup> suggesting that recruitment was not gender biased. The distribution of patient gender on pre- and



300 post-intervention observations was similar. There was no attrition, so we had a complete set of data, and only one substitution  
1 among patients. The substitutes were also randomised, so an intention-to-treat analysis was not necessary.

301  
302 There are also limitations. First, our small sample. With a larger sample we might have been able to show smaller effects. The  
303 premise of choosing a small trial and expecting a high effect size proved too optimistic.

304 Secondly, the design of our study calls for caution in making causal inferences. As previous researchers have emphasized,<sup>63</sup>  
305 <sup>64</sup> the link between physician training and patient recall is indirect, and mediated by what actually happened during information  
306 provision sequences in these meetings: In other words, the lack of an effect on recall could be due to a lack of change in how the  
307 information was provided, even though the amount was reduced. Such a result would implicate something lacking in the training  
308 *intervention*. Equally possible is that the physicians applied what they were taught, but that this had no effect on patient recall.  
309 This result would call into question the *content* of the training course, while highlighting the efficacy of its methods.

310 It is a limitation that it was not feasible to do the study with patients in a real treatment escalation situation. The fact that it was not  
311 their own treatment that was being discussed may have affected their recall. This would be true for all patients, however,  
312 regardless of the training status of the physician they consulted with.

313 Treatment fidelity was not measured for physician training in this study, but whether they changed some of their behaviour  
314 according to the teaching intervention is briefly explored in a qualitative study that showed how to define and assess quantifiable  
315 outcomes for three of the information sharing strategies taught in this intervention. It did not show significant effects on the  
316 physicians use of those three strategies<sup>65</sup>. We did endeavour to implement the training correctly and consistently for all  
317 participating physicians. Patient consultation fidelity was not measured. Amount of time available, setting and situation. were  
318 however identical for all consultations.

319 Recall was only measured immediately after the consultation. It would have been interesting to have additional patient recall  
320 results after an amount of time had passed. On the other hand, this might have led to a risk for contaminated results, as patients in  
321 the meantime may have discussed with others or read other information. There is also a risk that the fictitious situation would  
322 make the patients less prone to remember multiple facts, as they would not discuss details with spouse or relatives in order to  
323 actually choose a treatment.

324 The research team that made this analysis was, with the exception of JN, blinded to the intervention status of the transcripts from  
325 the consultations and recall interviews. Observer bias cannot be ruled out, although JN made efforts to ignore not being blind.  
326 Some results suggest the measurement is indeed valid; a) the measurement system was rigorously developed, yielding high inter-  
327 rater reliability,<sup>66</sup> b) there was no significant negative effect of increasing age within the age span 21 to 66 years on recall rate, and  
328 c) recall rate lessened with increased amount of information provided. These observations concur with findings in previous  
329 studies.<sup>47 67 68</sup>

We did not test pre-study health literacy, collect data on education levels, nor did we make a neuropsychological assessment of the participating patients. This was abstained because we feared it could be a stressor that might influence performance. In retrospect, post-visit assessments of health literacy might have shed additional light on our findings. Finally, all the participating physicians were volunteers, and we do not know their baseline skills or motivation. Motivated physicians<sup>46</sup> and physicians with lower skills benefit the most from training.<sup>69</sup>

## CONCLUSION

We were able to demonstrate that a 3-hours course in providing complex information about treatment options to patients was sufficient to improve physicians' ability to prioritize information. We found a significant negative association between the amount of information provided and recall rate, supporting previous findings that information provision should be limited to what is most relevant to the individual patient. Despite these effects, we could not demonstrate that patient recall rate improved significantly ( $p=0.099$ ) in this study. There are still huge knowledge gaps in our understanding of what happens along all the steps from communication trainer to the physician to the patient's recall, and further research is needed in this field.

### Practice points

MS patients recalled less than 40% of information provided to them, and the recall percentage decreased the more information they received. Improving neurologists' ability to enhance patients' recall of complex information requires more extensive training than a 3-hour session including role-play practice.

## DECLARATIONS

### Author contributions

P. Gulbrandsen: Conception and design, Methodology, Material preparation, Analysis and interpretation of data, Writing- Reviewing and Editing, Data curation.

T. Holmøy: Conception and design, Methodology, Material preparation, Analysis and interpretation of data, Writing- Reviewing and Editing.

O. Thomas: Formal statistical analysis, Analysis and interpretation of data, Reviewing and Editing.

M. Nylenna: Design, Methodology, Material preparation, Analysis and interpretation of data, Writing- Reviewing and Editing.

J.M. Nordfalk: Project administration, Investigation, Design, Methodology, Material preparation, Data collection, Analysis and interpretation of data, Writing- Original draft preparation, Reviewing and Editing, Data curation.

For peer review only - <http://bmjopen.bmj.com/site/about/guidelines.xhtml>

362  
1  
363 All authors read and approved the final manuscript.  
3  
364

### 365 **Acknowledgements**

366 We thank Reidun Førde and Henriette Høilund Kaupang for their contributions. We are grateful to Jonas Christoffer Lindstrøm  
9  
367 for his contributions to this paper. We are grateful to all MS patients and neurologists who have participated in this study.  
11  
368

### 369 **Ethics approval and consent to participate**

370 The project received ethics approval from the Data Protection Official for Research at Akershus University Hospital and have  
18  
371 been performed in accordance with the ethical standards laid down in the World Medical Association Declaration of Helsinki and  
20  
372 its later amendments. Sensitive data were protected by maintaining the Akershus University Hospital code of conduct in respect of  
22  
373 storing data only within specified permitted access drives and using encrypted hardware.  
24

374 The Regional Committee for Medical and Health Research Ethics (Southeast Norway) decided that this experiment is exempted  
26  
375 from review. Date: March 24, 2015. Reference # 2015/161.  
28

376 All participants gave their informed consent prior to their inclusion in the study. All participants were provided with information  
31  
377 about the study orally and in writing prior to giving their written consent. Considering that the project involved informing patients  
32  
378 about medications and risks related to a later stage of their disease, we involved an ethicist and a patient representative to discuss  
33  
379 how to handle the possibility of this causing worry or emotional reactions. As a result, we ensured that medical advice or  
36  
380 psychological support was provided in case of need.  
38  
39

### 382 **Consent for publication**

383 All patients and physicians have given written consent to publication of anonymized content.  
45  
46  
384  
48  
49

### 385 **Declaration of competing interests**

386 All authors declare that they have no competing interest.  
52  
53  
387  
55  
56

### 388 **Data sharing**

389 The data owner is Akershus University Hospital. Requests for anonymized data should be directed to co-author Professor Pål  
60  
390 Gulbrandsen.  
391

392 **Funding**

393 This work was supported by Stiftelsen Dam, previously named EkstraStiftelsen Helse og Rehabilitering, [grant number 7408].

397 **REFERENCES**

- 398 1. Myhr KM, Lehmann, A.K., Giæver, A., Gulowsen Celius, E., Thanh Tran, G., Espeset, K., Bø, L.,  
399 Johnsen, L., Kampman, M., Enstad, M., Midgard, R., Holmoy, T. Nasjonal faglig retningslinje for  
400 diagnostikk, attack- og sykdomsmodifiserende behandling av multipel sklerose. In: Health NDo,  
401 ed., 2017:11-16.
- 402 2. Maarouf A, Boutiere C, Rico A, et al. How much progress has there been in the second-line treatment of  
403 multiple sclerosis: A 2017 update. *Rev Neurol (Paris)* 2018;174(6):429-40.
- 404 3. Ruiter Jd. Alignment in communication: towards a new theory of communication: Chpt. 5.  
405 Methodological paradigms in interaction research. Amsterdam ; Philadelphia: John Benjamins  
406 Publishing Company 2013:24-25.
- 407 4. Heesen C, Kleiter, I., Meuth, S. G., Kramer, J. Kasper, J., Kopke, S., Gaissmaier, W. Benefit-risk  
408 perception of natalizumab therapy in neurologists and a large cohort of multiple sclerosis patients. *J*  
409 *Neurol Sci* 2017;376:181-90. doi: 10.1016/j.jns.2017.03.001 [published Online First: 2017/04/23]
- 410 5. Heesen C, Kasper J, Segal J, et al. Decisional role preferences, risk knowledge and information interests  
411 in patients with multiple sclerosis. *Mult Scler* 2004;10(6):643-50. doi:  
412 10.1191/1352458504ms1112oa [published Online First: 2004/12/09]
- 413 6. Thorne S, Con A, McGuinness L, et al. Health care communication issues in multiple sclerosis: an  
414 interpretive description. *Qual Health Res* 2004;14(1):5-22. doi: 10.1177/1049732303259618
- 415 7. Kopke S, Kern, S., Ziemssen, T., Berghoff, M., Kleiter, I., Marziniak, M., Paul, F., Vettorazzi, E., Pottgen,  
416 J., Fischer, K., Kasper, J., Heesen, C. Evidence-based patient information programme in early  
417 multiple sclerosis: a randomised controlled trial. *J Neurol Neurosurg Psychiatry* 2014;85(4):411-8.  
418 doi: 10.1136/jnnp-2013-306441 [published Online First: 2013/10/10]
- 419 8. Somerset M, Campbell R, Sharp DJ, et al. What do people with MS want and expect from health-care  
420 services? *Health expectations : an international journal of public participation in health care and*  
421 *health policy* 2001;4(1):29-37. [published Online First: 2001/04/05]
- 422 9. Kopke S, Solari A, Khan F, et al. Information provision for people with multiple sclerosis. *The Cochrane*  
423 *database of systematic reviews* 2018(4):CD008757. doi: 10.1002/14651858.CD008757.pub2  
424 [published Online First: 2014/04/23]
- 425 10. Zolnierok KB, Dimatteo MR. Physician communication and patient adherence to treatment: a meta-  
426 analysis. *Med Care* 2009;47(8):826-34. doi: 10.1097/MLR.0b013e31819a5acc [published Online  
427 First: 2009/07/09]
- 428 11. Kortman B. Patient Recall and Understanding of Instructions Concerning Splints Following a Zone 2  
429 Flexor Tendon Repair. *Occupational Therapy Australia* 1992;39(2):5-11.
- 430 12. Lewkovich GN, Haneline MT. Patient recall of the mechanics of cervical spine manipulation. *J*  
431 *Manipulative Physiol Ther* 2005;28(9):708-12. doi: 10.1016/j.jmpt.2005.09.014 [published Online  
432 First: 2005/12/06]
- 433 13. Pickney CS, Arnason JA. Correlation between patient recall of bone densitometry results and subsequent  
434 treatment adherence. *Osteoporos Int* 2005;16(9):1156-60. doi: 10.1007/s00198-004-1818-8  
435 [published Online First: 2005/03/04]
- 436 14. McCarthy DM, Waite KR, Curtis LM, et al. What did the doctor say? Health literacy and recall of  
437 medical instructions. *Med Care* 2012;50(4):277-82. doi: 10.1097/MLR.0b013e318241e8e1  
438 [published Online First: 2012/03/14]

- 439 15. Sandberg EH, Sharma R, Sandberg WS. Deficits in retention for verbally presented medical information.  
440 *Anesthesiology* 2012;117(4):772-9. doi: 10.1097/ALN.0b013e31826a4b02 [published Online First:  
441 2012/08/21]
- 442 16. Richard C, Glaser E, Lussier MT. Communication and patient participation influencing patient recall of  
443 treatment discussions. *Health expectations : an international journal of public participation in health*  
444 *care and health policy* 2017;20(4):760-70. doi: 10.1111/hex.12515 [published Online First:  
445 2016/11/22]
- 446 17. Demaree HA, DeLuca J, Gaudino EA, et al. Speed of information processing as a key deficit in multiple  
447 sclerosis: implications for rehabilitation. *J Neurol Neurosurg Psychiatry* 1999;67(5):661-3. doi:  
448 10.1136/jnnp.67.5.661 [published Online First: 1999/10/16]
- 449 18. Chiaravalloti ND, DeLuca J. Cognitive impairment in multiple sclerosis. *The Lancet Neurology*  
450 2008;7(12):1139-51. doi: 10.1016/S1474-4422(08)70259-X [published Online First: 2008/11/15]
- 451 19. Bakirtzis C, Ioannidis P, Messinis L, et al. The Rationale for Monitoring Cognitive Function in Multiple  
452 Sclerosis: Practical Issues for Clinicians. *Open Neurol J* 2018;12:31-40. doi:  
453 10.2174/1874205X01812010031 [published Online First: 2018/07/17]
- 454 20. Grant I, McDonald WI, Trimble MR, et al. Deficient learning and memory in early and middle phases of  
455 multiple sclerosis. *J Neurol Neurosurg Psychiatry* 1984;47(3):250-5. doi: 10.1136/jnnp.47.3.250  
456 [published Online First: 1984/03/01]
- 457 21. Rao SM, Leo GJ, Bernardin L, et al. Cognitive dysfunction in multiple sclerosis. I. Frequency, patterns,  
458 and prediction. *Neurology* 1991;41(5):685-91. doi: 10.1212/wnl.41.5.685 [published Online First:  
459 1991/05/01]
- 460 22. Rao JK, Anderson LA, Inui TS, et al. Communication interventions make a difference in conversations  
461 between physicians and patients: a systematic review of the evidence. *Med Care* 2007;45(4):340-9.  
462 doi: 10.1097/01.mlr.0000254516.04961.d5 [published Online First: 2007/05/15]
- 463 23. Watson PWB, McKinstry B. A systematic review of interventions to improve recall of medical advice in  
464 healthcare consultations. *J R Soc Med* 2009;102(6):235-43.
- 465 24. Griffin SJ, Kinmonth AL, Veltman MW, et al. Effect on health-related outcomes of interventions to alter  
466 the interaction between patients and practitioners: a systematic review of trials. *Ann Fam Med*  
467 2004;2(6):595-608. doi: 10.1370/afm.142 [published Online First: 2004/12/04]
- 468 25. Back A. Patient-physician communication in oncology: what does the evidence show? *Oncology*  
469 *(Williston Park)* 2006;20(1):67-74; discussion 77-8, 83. [published Online First: 2006/04/01]
- 470 26. Bertakis KD. The communication of information from physician to patient: a method for increasing  
471 patient retention and satisfaction. *J Fam Pract* 1977;5(2):217-22. [published Online First:  
472 1977/08/01]
- 473 27. Ley P. Communicating with patients: Improving communication, satisfaction and compliance. 11 New  
474 Fetter Lane, London EC4P 4EE: Croom Helm Ltd 1988:44.
- 475 28. Bradshaw PW, Ley P, Kincey JA. Recall of medical advice: comprehensibility and specificity. *Br J Soc*  
476 *Clin Psychol* 1975;14(1):55-62. [published Online First: 1975/02/01]
- 477 29. Reynolds PM, Sanson-Fisher RW, Poole AD, et al. Cancer and communication: information-giving in an  
478 oncology clinic. *Br Med J (Clin Res Ed)* 1981;282(6274):1449-51. [published Online First:  
479 1981/05/02]
- 480 30. Langewitz W, Ackermann S, Heierle A, et al. Improving patient recall of information: Harnessing the  
481 power of structure. *Patient Educ Couns* 2015;98(6):716-21. doi: 10.1016/j.pec.2015.02.003  
482 [published Online First: 2015/03/15]
- 483 31. Siegrist V, Langewitz, W., Mata, R., Maiori, D., Hertwig, R., Bingisser, R. The influence of information  
484 structuring and health literacy on recall and satisfaction in a simulated discharge communication.  
485 *Patient Educ Couns* 2018;101(12):2090-96. doi: 10.1016/j.pec.2018.08.008 [published Online First:  
486 2018/08/23]
- 487 32. Lehmann V, Labrie NHM, van Weert JCM, et al. Provider caring and structuring treatment information  
488 to improve cancer patients' recall: Does it help? *Patient Educ Couns* 2020;103(1):55-62. doi:  
489 10.1016/j.pec.2019.07.011 [published Online First: 2019/07/28]
- 490 33. Lehmann V, Labrie NHM, van Weert JCM, et al. Tailoring the amount of treatment information to  
491 cancer patients' and survivors' preferences: Effects on patient-reported outcomes. *Patient Educ*  
492 *Couns* 2020;103(3):514-20. doi: 10.1016/j.pec.2019.09.024 [published Online First: 2019/10/06]



- 493 34. Anderson JL, Dodman S, Kopelman M, et al. Patient information recall in a rheumatology clinic.  
494 *Rheumatol Rehabil* 1979;18(1):18-22.
- 495 35. Pugh B. Motivational Influences on Transfer. *Educ Psychol* 2006;41(3):147-60. [published Online First:  
496 08 Jun 2010]
- 497 36. Bol N, Smets EMA, Burgers JA, et al. Older Patients' Recall of Online Cancer Information: Do Ability  
498 and Motivation Matter More than Chronological Age? *Journal of health communication*  
499 2018;23(1):9-19. doi: 10.1080/10810730.2017.1394400 [published Online First: 2017/12/12]
- 500 37. Apsler R, Sears DO. Warning, personal involvement, and attitude change. *J Pers Soc Psychol*  
501 1968;9(2):162-6. [published Online First: 1968/06/01]
- 502 38. Maeland Ø. Annual Hospital Board Document, Akershus University Hospital Board, Norway. In: Board  
503 AUH, ed., 2018 2.
- 504 39. Dorr J, Paul F. The transition from first-line to second-line therapy in multiple sclerosis. *Curr Treat*  
505 *Options Neurol* 2015;17(6):354. doi: 10.1007/s11940-015-0354-5 [published Online First:  
506 2015/04/29]
- 507 40. Torkildsen O, Myhr KM, Bo L. Disease-modifying treatments for multiple sclerosis - a review of  
508 approved medications. *Eur J Neurol* 2016;23 Suppl 1:18-27. doi: 10.1111/ene.12883
- 509 41. Pardo G, Jones DE. The sequence of disease-modifying therapies in relapsing multiple sclerosis: safety  
510 and immunologic considerations. *J Neurol* 2017;264(12):2351-74. doi: 10.1007/s00415-017-8594-9  
511 [published Online First: 2017/09/08]
- 512 42. Gorelik L, Lerner M, Bixler S, et al. Anti-JC virus antibodies: implications for PML risk stratification.  
513 *Ann Neurol* 2010;68(3):295-303. doi: 10.1002/ana.22128
- 514 43. Plavina T, Subramanyam M, Bloomgren G, et al. Anti-JC virus antibody levels in serum or plasma  
515 further define risk of natalizumab-associated progressive multifocal leukoencephalopathy. *Ann*  
516 *Neurol* 2014;76(6):802-12. doi: 10.1002/ana.24286 [published Online First: 2014/10/03]
- 517 44. Schwab N, Schneider-Hohendorf T, Pignolet B, et al. Therapy with natalizumab is associated with high  
518 JCV seroconversion and rising JCV index values. *Neurol Neuroimmunol Neuroinflamm*  
519 2016;3(1):e195. doi: 10.1212/NXI.000000000000195 [published Online First: 2016/02/06]
- 520 45. Reuwer AQ, Heron M, van der Dussen D, et al. The clinical utility of JC virus antibody index  
521 measurements in the context of progressive multifocal leukoencephalopathy. *Acta Neurol Scand*  
522 2017;136 Suppl 201:37-44. doi: 10.1111/ane.12840 [published Online First: 2017/10/27]
- 523 46. Fossli Jensen B, Gulbrandsen P, Dahl FA, et al. Effectiveness of a short course in clinical  
524 communication skills for hospital doctors: results of a crossover randomized controlled trial  
525 (ISRCTN22153332). *Patient Educ Couns* 2011;84(2):163-9. doi: 10.1016/j.pec.2010.08.028  
526 [published Online First: 2010/11/06]
- 527 47. Ley P, Bradshaw PW, Eaves D, et al. A method for increasing patients' recall of information presented  
528 by doctors. *Psychol Med* 1973;3(2):217-20.
- 529 48. Kreuter MW, Bull FC, Clark EM, et al. Understanding how people process health information: a  
530 comparison of tailored and nontailored weight-loss materials. *Health Psychol* 1999;18(5):487-94.  
531 [published Online First: 1999/10/16]
- 532 49. Albada A, Ausems MG, Bensing JM, et al. Tailored information about cancer risk and screening: a  
533 systematic review. *Patient Educ Couns* 2009;77(2):155-71. doi: 10.1016/j.pec.2009.03.005  
534 [published Online First: 2009/04/21]
- 535 50. Nordfalk JM, Gulbrandsen P, Gerwing J, et al. Development of a measurement system for complex oral  
536 information transfer in medical consultations. *BMC Med Res Methodol* 2019;19(1):139. doi:  
537 10.1186/s12874-019-0788-7 [published Online First: 2019/07/06]
- 538 51. Degner LF. The Control Preferences Scale. *The Canadian journal of nursing research* 1997;29(3):21-43.
- 539 52. Elwyn G, Barr PJ, Grande SW, et al. Developing CollaboRATE: a fast and frugal patient-reported  
540 measure of shared decision making in clinical encounters. *Patient Educ Couns* 2013;93(1):102-7.  
541 doi: 10.1016/j.pec.2013.05.009 [published Online First: 2013/06/19]
- 542 53. Barr PJ, Thompson R, Walsh T, et al. The psychometric properties of CollaboRATE: a fast and frugal  
543 patient-reported measure of the shared decision-making process. *J Med Internet Res* 2014;16(1):e2.  
544 doi: 10.2196/jmir.3085 [published Online First: 2014/01/07]
- 545 54. Gulbrandsen P, Krupat E, Benth JS, et al. "Four Habits" goes abroad: report from a pilot study in  
546 Norway. *Patient Educ Couns* 2008;72(3):388-93.

- 547 55. Fossli Jensen B, Gulbrandsen P, Benth JS, et al. Interrater reliability for the Four Habits Coding Scheme  
548 as part of a randomized controlled trial. *Patient Educ Couns* 2010;80(3):405-9. doi:  
549 10.1016/j.pec.2010.06.032
- 550 56. Col NF, Solomon, A. J., Springmann, V., Garbin, C. P., Ionete, C., Pbert, L., Alvarez, E., Tierman, B.,  
551 Hopson, A., Kutz, C., Berrios Morales, I., Griffin, C., Phillips, G., Ngo, L. H. Whose Preferences  
552 Matter? A Patient-Centered Approach for Eliciting Treatment Goals. *Med Decis Making*  
553 2018;38(1):44-55. doi: 10.1177/0272989X17724434 [published Online First: 2017/08/15]
- 554 57. Szmuiłowicz E, el-Jawahri A, Chiappetta L, et al. Improving residents' end-of-life communication skills  
555 with a short retreat: a randomized controlled trial. *J Palliat Med* 2010;13(4):439-52. doi:  
556 10.1089/jpm.2009.0262 [published Online First: 2010/03/06]
- 557 58. Clayton JM, Butow, P. N., Waters, A., Laidsaar-Powell, R. C., O'Brien, A., Boyle, F., Back, A. L.,  
558 Arnold, R. M., Tulsy JA, Tattersall, M. H. . Evaluation of a novel individualised communication-  
559 skills training intervention to improve doctors' confidence and skills in end-of-life communication.  
560 *Palliat Med* 2012;27(3):236-43. doi: 10.1177/0269216312449683
- 561 59. Tarn DM, Paterniti DA, Orosz DK, et al. Intervention to enhance communication about newly  
562 prescribed medications. *Ann Fam Med* 2013;11(1):28-36. doi: 10.1370/afm.1417 [published Online  
563 First: 2013/01/16]
- 564 60. Kasper J, Liethmann, Katrin, Heesen, Christoph, Reissmann, Daniel R., Geiger, Friedemann. Training  
565 doctors briefly and in situ to involve their patients in making medical decisions-Preliminary testing  
566 of a newly developed module. *Health expectations : an international journal of public participation*  
567 *in health care and health policy* 2017;20(6):1254-63.
- 568 61. Ley P, Spelman MS. Communications in an out-patient setting. *Br J Soc Clin Psychol* 1965;4(2):114-6.  
569 [published Online First: 1965/06/01]
- 570 62. Kampman MT, Aarseth JH, Grytten N, et al. Sex ratio of multiple sclerosis in persons born from 1930 to  
571 1979 and its relation to latitude in Norway. *J Neurol* 2013;260(6):1481-8. doi: 10.1007/s00415-012-  
572 6814-x
- 573 63. Cegala DJ, Broz SL. Physician communication skills training: a review of theoretical backgrounds,  
574 objectives and skills. *Med Educ* 2002;36(11):1004-16. doi: DOI 10.1046/j.1365-2923.2002.01331.x
- 575 64. van Weel-Baumgarten E. Is linking research, teaching and practice in communication in health care the  
576 way forward? *Patient Educ Couns* 2016;99 1441-45. doi: <https://doi.org/10.1016/j.pec.2016.07.011>
- 577 65. Nordfalk JM, Menichetti J, Thomas O, et al. Three strategies when physicians provide complex  
578 information in interactions with patients: How to recognize and measure them. *Patient Educ Couns*  
579 2021 doi: 10.1016/j.pec.2021.10.013 [published Online First: 2021/10/30]
- 580 66. Nordfalk JM, Gulbrandsen, P., Gerwing, J., Nylenna, M., Menichetti, J. Development of a measurement  
581 system for complex oral information transfer in medical consultations. *BMC Med Res Methodol*  
582 2019;19(1):139-48. doi: 10.1186/s12874-019-0788-7 [published Online First: 2019/07/06]
- 583 67. McGuire LC. Remembering what the doctor said: organization and adults' memory for medical  
584 information. *Exp Aging Res* 1996;22(4):403-28. doi: 10.1080/03610739608254020
- 585 68. Lundervold AJ, Wollschlager D, Wehling E. Age and sex related changes in episodic memory function  
586 in middle aged and older adults. *Scand J Psychol* 2014;55(3):225-32. doi: 10.1111/sjop.12114  
587 [published Online First: 2014/03/08]
- 588 69. Bylund CL, Banerjee SC, Bialer PA, et al. A rigorous evaluation of an institutionally-based  
589 communication skills program for post-graduate oncology trainees. *Patient Educ Couns*  
590 2018;101(11):1924-33. doi: 10.1016/j.pec.2018.05.026 [published Online First: 2018/06/09]

## 595 FIGURE LEGENDS

- 597 Figure 1. Study Design Overview
- 598 Figure 2. Data Collection Procedure
- 599 Figure 3. CONSORT 2010 Participant Flow Diagram

600  
4  
601  
6  
602  
8  
603  
10  
11  
12  
13  
14  
15  
16  
17  
18  
19  
20  
21  
22  
23  
24  
25  
26  
27  
28  
29  
30  
31  
32  
33  
34  
35  
36  
37  
38  
39  
40  
41  
42  
43  
44  
45  
46  
47  
48  
49  
50  
51  
52  
53  
54  
55  
56  
57  
58  
59  
60

**SUPPLEMENTARY FILES**

Registered study record: ISRCTN trial 42739508

For peer review only



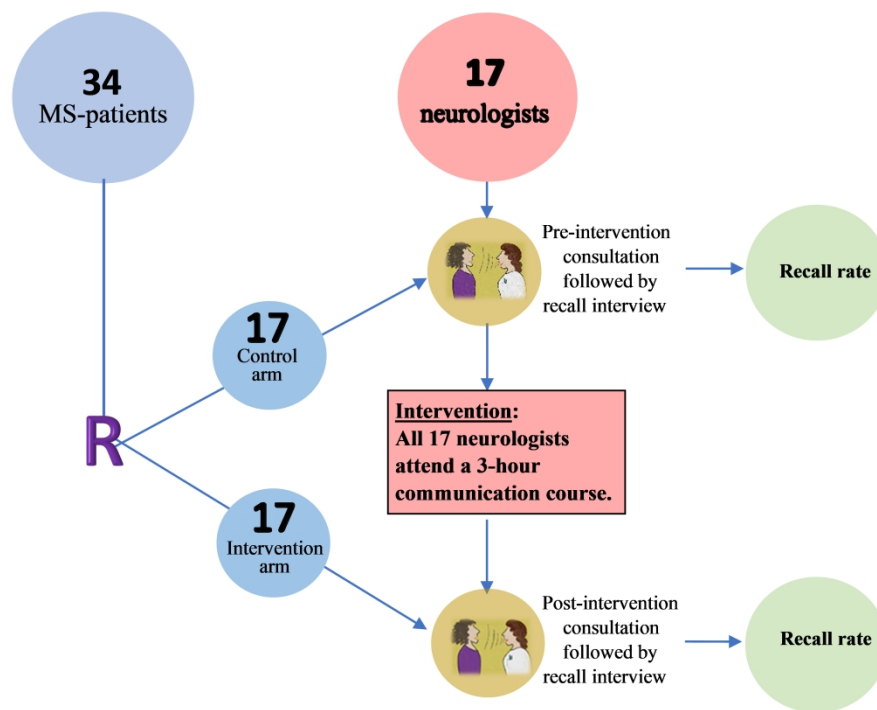

Figure 1. Study Design Overview

1015x720mm (95 x 95 DPI)

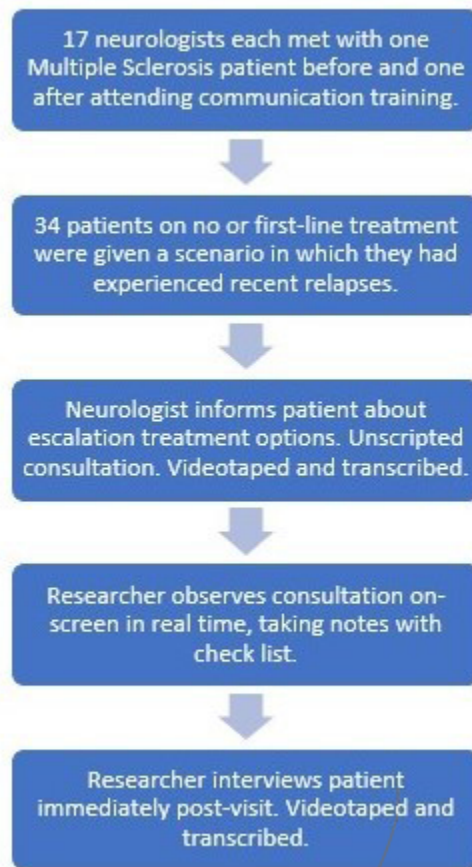

Figure 2. Data Collection Procedure

CONSORT 2010 Flow Diagram

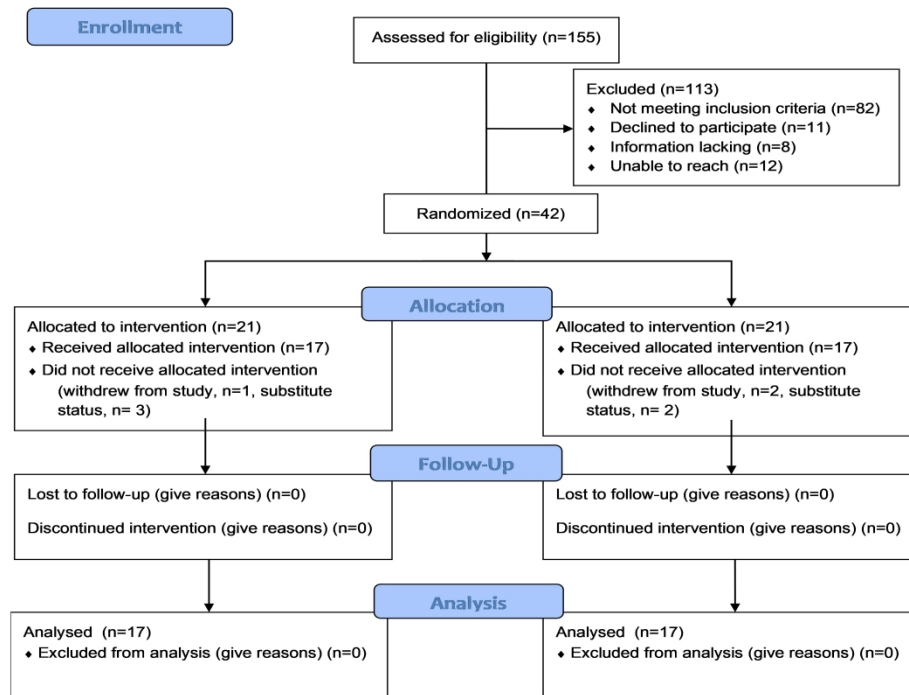

Figure 3. CONSORT 2010 Participant Flow Diagram

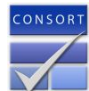

## CONSORT 2010 checklist of information to include when reporting a randomised trial\*

| Section/Topic                    | Item No | Checklist item                                                                                                                                                                              | Reported on page No |
|----------------------------------|---------|---------------------------------------------------------------------------------------------------------------------------------------------------------------------------------------------|---------------------|
| <b>Title and abstract</b>        |         |                                                                                                                                                                                             |                     |
|                                  | 1a      | Identification as a randomised trial in the title                                                                                                                                           | 1                   |
|                                  | 1b      | Structured summary of trial design, methods, results, and conclusions (for specific guidance see CONSORT for abstracts)                                                                     | 2                   |
| <b>Introduction</b>              |         |                                                                                                                                                                                             |                     |
| Background and objectives        | 2a      | Scientific background and explanation of rationale                                                                                                                                          | 3                   |
|                                  | 2b      | Specific objectives or hypotheses                                                                                                                                                           | 3-4                 |
| <b>Methods</b>                   |         |                                                                                                                                                                                             |                     |
| Trial design                     | 3a      | Description of trial design (such as parallel, factorial) including allocation ratio                                                                                                        | 4                   |
|                                  | 3b      | Important changes to methods after trial commencement (such as eligibility criteria), with reasons                                                                                          |                     |
| Participants                     | 4a      | Eligibility criteria for participants                                                                                                                                                       | 4                   |
|                                  | 4b      | Settings and locations where the data were collected                                                                                                                                        | 5                   |
| Interventions                    | 5       | The interventions for each group with sufficient details to allow replication, including how and when they were actually administered                                                       | 5                   |
| Outcomes                         | 6a      | Completely defined pre-specified primary and secondary outcome measures, including how and when they were assessed                                                                          | 6                   |
|                                  | 6b      | Any changes to trial outcomes after the trial commenced, with reasons                                                                                                                       |                     |
| Sample size                      | 7a      | How sample size was determined                                                                                                                                                              | 7                   |
|                                  | 7b      | When applicable, explanation of any interim analyses and stopping guidelines                                                                                                                |                     |
| <b>Randomisation:</b>            |         |                                                                                                                                                                                             |                     |
| Sequence generation              | 8a      | Method used to generate the random allocation sequence                                                                                                                                      | 7                   |
|                                  | 8b      | Type of randomisation; details of any restriction (such as blocking and block size)                                                                                                         | 7                   |
| Allocation concealment mechanism | 9       | Mechanism used to implement the random allocation sequence (such as sequentially numbered containers), describing any steps taken to conceal the sequence until interventions were assigned | 7                   |
| Implementation                   | 10      | Who generated the random allocation sequence, who enrolled participants, and who assigned participants to interventions                                                                     | 7                   |
| Blinding                         | 11a     | If done, who was blinded after assignment to interventions (for example, participants, care providers, those                                                                                |                     |

|                                                      |     |                                                                                                                                                   |                                                                                             |
|------------------------------------------------------|-----|---------------------------------------------------------------------------------------------------------------------------------------------------|---------------------------------------------------------------------------------------------|
|                                                      |     | assessing outcomes) and how                                                                                                                       | 7                                                                                           |
|                                                      | 11b | If relevant, description of the similarity of interventions                                                                                       |                                                                                             |
| Statistical methods                                  | 12a | Statistical methods used to compare groups for primary and secondary outcomes                                                                     | 7                                                                                           |
|                                                      | 12b | Methods for additional analyses, such as subgroup analyses and adjusted analyses                                                                  | 7                                                                                           |
| <b>Results</b>                                       |     |                                                                                                                                                   |                                                                                             |
| Participant flow (a diagram is strongly recommended) | 13a | For each group, the numbers of participants who were randomly assigned, received intended treatment, and were analysed for the primary outcome    | 8,9                                                                                         |
|                                                      | 13b | For each group, losses and exclusions after randomisation, together with reasons                                                                  | 9                                                                                           |
| Recruitment                                          | 14a | Dates defining the periods of recruitment and follow-up                                                                                           | 8                                                                                           |
|                                                      | 14b | Why the trial ended or was stopped                                                                                                                |                                                                                             |
| Baseline data                                        | 15  | A table showing baseline demographic and clinical characteristics for each group                                                                  | 8                                                                                           |
| Numbers analysed                                     | 16  | For each group, number of participants (denominator) included in each analysis and whether the analysis was by original assigned groups           | 9                                                                                           |
| Outcomes and estimation                              | 17a | For each primary and secondary outcome, results for each group, and the estimated effect size and its precision (such as 95% confidence interval) | 9                                                                                           |
|                                                      | 17b | For binary outcomes, presentation of both absolute and relative effect sizes is recommended                                                       |                                                                                             |
| Ancillary analyses                                   | 18  | Results of any other analyses performed, including subgroup analyses and adjusted analyses, distinguishing pre-specified from exploratory         | 9                                                                                           |
| Harms                                                | 19  | All important harms or unintended effects in each group (for specific guidance see CONSORT for harms)                                             |                                                                                             |
| <b>Discussion</b>                                    |     |                                                                                                                                                   |                                                                                             |
| Limitations                                          | 20  | Trial limitations, addressing sources of potential bias, imprecision, and, if relevant, multiplicity of analyses                                  | 10,11                                                                                       |
| Generalisability                                     | 21  | Generalisability (external validity, applicability) of the trial findings                                                                         | 10-12                                                                                       |
| Interpretation                                       | 22  | Interpretation consistent with results, balancing benefits and harms, and considering other relevant evidence                                     | 10-12                                                                                       |
| <b>Other information</b>                             |     |                                                                                                                                                   |                                                                                             |
| Registration                                         | 23  | Registration number and name of trial registry                                                                                                    | ISRCTN<br>42739508                                                                          |
| Protocol                                             | 24  | Where the full trial protocol can be accessed, if available                                                                                       |                                                                                             |
| Funding                                              | 25  | Sources of funding and other support (such as supply of drugs), role of funders                                                                   | EkstraStiftelsen<br>Helse og Reha-<br>bilitering (now<br>Stiftelsen Dam)<br>grant no. 7408. |

1  
2  
3  
4  
5  
6  
7  
8  
9  
10  
11  
12  
13  
14  
15  
16  
17  
18  
19  
20  
21  
22  
23  
24  
25  
26  
27  
28  
29  
30  
31  
32  
33  
34  
35  
36  
37  
38  
39  
40  
41  
42  
43  
44  
45  
46

\*We strongly recommend reading this statement in conjunction with the CONSORT 2010 Explanation and Elaboration for important clarifications on all the items. If relevant, we also recommend reading CONSORT extensions for cluster randomised trials, non-inferiority and equivalence trials, non-pharmacological treatments, herbal interventions, and pragmatic trials.

Additional extensions are forthcoming: for those and for up to date references relevant to this checklist, see [www.consort-statement.org](http://www.consort-statement.org).

For peer review only

1  
2  
3 ISRCTN42739508  
4

5 <https://doi.org/10.1186/ISRCTN42739508>  
6  
7

# 8 Improved involvement of multiple sclerosis 9 patients in discussions about treatment 10 11 12 13

## 14 **Condition category**

15 Nervous System Diseases

## 16 **Date applied**

17 23/06/2016

## 18 **Date assigned**

19 24/06/2016

## 20 **Last edited**

21 15/01/2021

## 22 **Prospective/Retrospective**

23 Retrospectively registered

## 24 **Overall trial status**

25 Completed

## 26 **Recruitment status**

27 No longer recruiting

## 28 **Publication status**

29 Results overdue

## 30 **Plain English Summary**

31 Background and study aims:

32 Multiple sclerosis (MS) is one of the most common diseases of the central nervous  
33 system (brain and spinal cord). Healthy nerves are coated in a fatty casing (myelin  
34 sheath) which helps messages to travel quickly and smoothly along nerves. When a  
35 person is suffering from MS, the immune system, which normally helps to protect against  
36 infection, attacks the myelin sheath, stripping it from the nerves (demyelination). This  
37 demyelination means that messages cannot travel along the nerves effectively, causing  
38 a range of problems including loss of vision, problems with balance and coordination as  
39 well as fatigue (extreme tiredness), stress and mental health difficulties such as  
40 depression. Patients with MS often face difficult decisions about their choice of  
41 treatment. The reasons for this are several: the natural course of the disease is  
42 unpredictable but potentially serious, there are several new drugs available with different  
43 effects, side effects, and risks, and because of the drugs' novelty long-term effects are  
44 not well-known, while the disease itself is life-long usually spanning decades. It is hard,  
45 even for a doctor, to keep track of all the information available, and even experts will  
46 admit uncertainty about choice of treatment. Patient involvement in these situations is a  
47 difficult task. Patient involvement in decision-making requires information too be provided  
48 during medical encounters. Several studies indicate that doctors do not provide  
49 sufficiently structured, precise information and it is often characterized by use of jargon,  
50 and not adjusted to the patient's needs. This study aims to try out whether a rather  
51 simple training session for doctors leads to an improvement in these respects, in a way  
52 that helps patients to better recall the information they received.  
53  
54  
55  
56  
57  
58  
59  
60

#### Who can participate?

Adults with MS who are currently on their first drug treatment and doctors working in the Neurological department of Akershus University Hospital who regularly meet MS patients.

#### What does the study involve?

All participating doctors receive a three hour training session in groups of 5-8. The training session involves a brief introduction followed by learning about how best to provide patients with information. The rest of the session involves role playing, reflecting on the content of the session and providing feedback, before a brief summary at the end. Patients are randomly allocated to one of two groups. Those in the first group meet with the doctor for a consultation before they have attended the training session and those in the second group meet with the doctor after they have attended the training session. For both groups, the consultations are videotaped so that they can be reviewed by the research team to assess the information provided in the session. Patients are also interviewed before and immediately after the consultation in order to find out how much information the doctor gave them they are able to remember.

#### What are the possible benefits and risks of participating?

Not provided at time of registration

#### Where is the study run from?

Akershus University Hospital (Norway)

#### When is the study starting and how long is it expected to run for?

April 2014 to December 2019

#### Who is funding the study?

Norwegian Foundation for Health and Rehabilitation, ExtraStiftelsen (Norway)

#### Who is the main contact?

Professor Pål Gulbrandsen  
pal.gulbrandsen@medisin.uio.no

### **Trial website**

### **Contact information**

#### **Type**

Scientific

#### **Primary contact**

Prof Pål Gulbrandsen

#### **ORCID ID**

#### **Contact details**

HØKH Research Centre  
Akershus University Hospital



1  
2  
3 Lørenskog  
4 1475  
5 Norway  
6 95827288  
7 [pal.gulbrandsen@medisin.uio.no](mailto:pal.gulbrandsen@medisin.uio.no)  
8

## 9 Additional identifiers

10  
11 **EudraCT number**

12 **IRAS number**

13 **ClinicalTrials.gov number**

14 **Protocol/serial number**

15 2015/FO7408

## 16 Study information

17  
18 **Scientific title**

19 Enabling shared decision-making about treatment with multiple sclerosis patients: A  
20 preclinical intervention study

21  
22 **Acronym**

23 **Study hypothesis**

24 A three hour course in how to provide information will improve MS patients' ability to  
25 recall information given by doctors.

26  
27 **Ethics approval**

28 The Regional Committee for Medical and Health Research Ethics (Southeast Norway)  
29 decided that as this experiment is not medical or health research and therefore  
30 exempted from review. 24/03/2015, ref: 2015/161

31  
32 **Study design**

33 Preclinical randomised parallel study

34  
35 **Primary study design**

36 Interventional

37  
38 **Secondary study design**

39 Randomised parallel trial

40  
41 **Trial setting**

42 Hospitals

43  
44 **Trial type**

1  
2  
3 Other

## 4 **Patient information sheet**

5  
6  
7 Available in Norwegian by contacting the principal investigator:  
8 pal.gulbrandsen@medisin.uio.no  
9

## 10 **Condition**

11  
12  
13 Multiple sclerosis  
14

## 15 **Intervention**

16  
17  
18 Participating patients are randomly allocated to meet a doctor before or after the doctor  
19 has been trained. One researcher observes the doctor-patient interaction and notes all  
20 information that is provided. The researcher interviews the patient directly after, first  
21 using open questions to elicit understanding and recall, followed by prompted, but not  
22 leading questions about information the doctor provided to elicit as accurate recall as  
23 possible. Both doctor-patient interaction and post-visit interview are videotaped, and  
24 independent coders that will not know if the interaction is pre or post intervention identify  
25 and decide whether patient recall of each information the doctor has given is sufficiently  
26 precise to represent the information given. Following these procedures the percentage of  
27 given information that is recalled, and whether there is a significant difference between  
28 patients in the pre-course and post-course arms of the study is calculated. In addition, a  
29 battery of questionnaires (MAPPIN'SDM, Collaborate, Four Habits Patient Questionnaire)  
30 will be used to map the patients' evaluation of communication, information provision, and  
31 involvement in decision-making.  
32  
33

34  
35 The training session for doctors is led by an experienced teacher in clinical  
36 communication and lasts 3 hours and is run for groups of 5-8 doctors at a time. The  
37 training session involves being given a brief introduction about the 6 main steps of  
38 information provision:

- 39 1. Inducing a trusting atmosphere
- 40 2. Finding out what the patient knows
- 41 3. Prioritising which information to convey
- 42 4. Portioning information using micropauses
- 43 5. Rationing information when sensing that the patient feels unsafe
- 44 6. Checking what the patient has understood.

45 The rest of the session consists of role-plays, reflections, and feedback, and there is a  
46 brief summary round at the end.  
47  
48

## 49 **Intervention type**

50  
51 Behavioural  
52

## 53 **Phase**

## 54 **Drug names**

## 55 **Primary outcome measure**

56  
57  
58 The amount of information provided by the doctors that is recalled by the patients is  
59 measured using patient interviews immediately after the consultation.  
60

## Secondary outcome measures

1. Patient involvement is measured using:

1.1. Control preference scale (Degner et al), before and after consultation (patients and doctors)

1.2. MAPPIN' SDM (Kasper et al.) after the consultation (patients and doctors)

1.3. Collaborate (Elwyn et al.) after the consultation (patients only)

2. Communication and information quality is measured using the Four Habits Patient Questionnaire (patients)

3. Doctor communication self-efficacy is measured using Parle et al.'s self-efficacy questionnaire before and after the consultation and three months later

4. Adherence to information principles is measured through reviewing the video recordings of the sessions using the Four Habits Coding Scheme

## Overall trial start date

01/04/2014

## Overall trial end date

31/12/2019

## Reason abandoned (if study stopped)

### Eligibility

### Participant inclusion criteria

Patients:

1. Patients with relapsing remitting MS

2. Currently use a first line drug

3. Not previously been exposed to the decision to begin with a second line drug

4. Aged 18 years and over

Doctors:

1. All doctors working in the Neurological department of Akershus University Hospital

2. Regularly meet multiple sclerosis patients

### Participant type

Patient

### Age group

Adult

### Gender

Both

**Target number of participants**

Patients: 32 Doctors: 16

**Participant exclusion criteria**

No exclusion criteria.

**Recruitment start date**

01/05/2016

**Recruitment end date**

31/05/2016

**Locations****Countries of recruitment**

Norway

**Trial participating centre**

Akershus University Hospital

Post office box 1000

Lørenskog

1478

Norway

**Sponsor information****Organisation**

Akershus University Hospital

**Sponsor details**

Sykehusveien 25

Lørenskog

1478

Norway

**Sponsor type**

Hospital/treatment centre

**Website****GRID**

[grid.411279.8](http://grid.411279.8)

**Funders**

## Funder type

Government

## Funder name

Norwegian Foundation for Health and Rehabilitation, ExtraStiftelsen (EkstraStiftelsen Helse og Rehabilitering)

## Alternative name(s)

Norwegian Foundation for Health and Rehabilitation, ExtraStiftelsen, Stiftelsen Dam & Dam Foundation

## Funding Body Type

private sector organisation

## Funding Body Subtype

Trusts, charities, foundations (both public and private)

## Location

Norway

## Results and Publications

### Publication and dissemination plan

Current publication and dissemination plan as of 15/01/2021:

Planned publication of papers in scientific journals:

The effect of the training on patient recall (soon to be submitted)

The effect of the training on patient evaluation of communication, information, and involvement (soon to be submitted)

The effect of the training on doctor adherence to principles of information provision (soon to be submitted)

\_\_\_\_\_

Previous publication and dissemination plan:

Planned publication of several papers in scientific journals:

The effect of the training on patient recall

2. The effect of the training on patient evaluation of communication, information, and involvement

3. The effect of the training on doctor adherence to principles of information provision

4. Several other papers using qualitative methods, not about effects of the trial, but rather about how training affects the interaction in other ways

## Intention to publish date

1  
2  
3 31/12/2021  
4

5 **Individual participant data (IPD) sharing statement**  
6 **Participant level data**  
7  
8

9 Data sharing statement to be made available at a later date  
10

11 **Trial outputs**  
12

| Output type | Details | Date created | Date added | Peer reviewed? | Patient-facing? |
|-------------|---------|--------------|------------|----------------|-----------------|
|-------------|---------|--------------|------------|----------------|-----------------|

13  
14  
15  
16  
17 No data available in table  
18

19 **Additional files**  
20

21 **Editorial Notes**  
22

23  
24 15/01/2021: The following changes were made to the trial record: 1. The publication and  
25 dissemination plan was changed. 2. The intention to publish date was changed from  
26 31/12/2020 to 31/12/2021. 13/12/2017: Internal review. 11/12/2017: The overall trial end  
27 date was changed from 31/12/2016 to 31/12/2019. Intention to publish date was changed  
28 from 01/02/2018 to 31/12/2020.  
29  
30  
31  
32  
33  
34  
35  
36  
37  
38  
39  
40  
41  
42  
43  
44  
45  
46  
47  
48  
49  
50  
51  
52  
53  
54  
55  
56  
57  
58  
59  
60
